1 **Extrasynaptic volume transmission: A novel route for**  
2 **neuropeptide signaling in nematodes**

3

4 Louise E. Atkinson<sup>1</sup>, Yang Liu<sup>2</sup>, Fiona McKay<sup>1</sup>, Elke Vandeweyer<sup>3</sup>, Charles Viau<sup>1</sup>, Allister Irvine<sup>1</sup>,  
5 Bruce A. Rosa<sup>4</sup>, Zihui Li<sup>2</sup>, Nikki J. Marks<sup>1</sup>, Aaron G. Maule<sup>1</sup>, Makedonka Mitreva<sup>4</sup>, Isabel Beets<sup>3</sup>,  
6 Lingjun Li<sup>2</sup>, Angela Mousley<sup>1\*</sup>

7

8 <sup>1</sup>Parasitology & Pathogen Biology, The Institute for Global Food Security, School of Biological  
9 Sciences, Queen's University Belfast, Belfast, UK.

10 <sup>2</sup>School of Pharmacy and Department of Chemistry, University of Wisconsin-Madison, Madison,  
11 WI, USA.

12 <sup>3</sup>Department of Biology, KU Leuven, Leuven, Belgium.

13 <sup>4</sup>McDonnell Genome Institute, and Division of Infectious Diseases, Department of Medicine,  
14 Washington University School of Medicine, St. Louis, MO, USA.

15

16 \*Corresponding author

17 **Email:** a.mousley@qub.ac.uk (AM)

18

19 **Keywords**

20 Extrasynaptic volume transmission; pseudocoelomic fluid, neuropeptide; neuronal signaling;  
21 nematode, parasite, *Ascaris*.

22

23

## 24 **Abstract**

25 Neural circuit synaptic connectivities (the connectome) provide the anatomical foundation for our  
26 understanding of nematode nervous system function. However, other non-synaptic routes of  
27 communication are known in invertebrates including extrasynaptic volume transmission (EVT),  
28 which enables short- and/or long-range communication in the absence of synaptic connections.  
29 Although EVT has been highlighted as a facet of *Caenorhabditis elegans* neurosignaling, no  
30 experimental evidence identifies body cavity fluid (pseudocoelomic fluid; PCF) as a vehicle for  
31 either neuropeptide or biogenic amine transmission. In the parasitic nematode *Ascaris suum*  
32 FMRFamide-like peptides encoded on *flp-18* potentially stimulate female reproductive organs but are  
33 only expressed in cells that are anatomically distant from the reproductive organ, with no known  
34 synaptic connections to this tissue. Here we report a new non-synaptic mode of signaling in  
35 nematodes mediated by neuropeptides within the PCF. Our data show that: (i) *A. suum* PCF (As-  
36 PCF) contains a catalogue of neuropeptides including FMRFamide-like peptides and neuropeptide-  
37 like proteins; (ii) the *A. suum* FMRFamide-like peptide As-FLP-18A dominates the As-PCF  
38 peptidome; (iii) As-PCF potentially modulates nematode reproductive muscle function *ex vivo*,  
39 mirroring the effects of synthetic FLP-18 peptides; (iv) As-PCF activates the *C. elegans* FLP-18  
40 receptors NPR-4 and -5; (v) As-PCF alters *C. elegans* behavior and, (vi) FLP-18 and FLP-18  
41 receptors display pan-phylum distribution in nematodes. Here we provide the first direct  
42 experimental evidence that supports an extrasynaptic volume route for neuropeptide transmission  
43 in nematodes. These data demonstrate non-synaptic signaling within the nematode functional  
44 connectome and are pertinent to receptor deorphanisation approaches underpinning drug  
45 discovery programs for nematode pathogens.

46

## 47 **Introduction**

48 Our current understanding of nematode neuronal circuitry is based on comprehensive  
49 *Caenorhabditis elegans* synaptic connectome data [1-3]. The *C. elegans* blueprint underpins  
50 fundamental parasitic nematode neurobiology driving anatomical and functional connectomics

51 studies in model parasites such as *Ascaris*, in which the simple neuronal architecture described in  
52 *C. elegans* appears to be highly conserved [see 4]. Whilst not experimentally demonstrated in  
53 nematodes to date, the existence and significance of additional forms of non-synaptic neuronal  
54 communication have been recognized among invertebrates [5, 6]. For example, in crustaceans,  
55 extrasynaptic volume transmission (EVT) operates beyond the synaptic connectome, mediating  
56 long-range hormonal communication in the absence of neuronal synapses [7, 8]. Notably, EVT  
57 has been implicated in nematode neuronal signaling [9-14]. Indeed, the *C. elegans* wired  
58 connectome does not always support receptor-ligand interactions that have been functionally  
59 linked; there are examples of signaling pathways where receptors are not located co-synaptically  
60 with neurons in both monoamine and neuropeptide systems [15-18], supporting a role for EVT in  
61 neurotransmission. Further, EVT has been putatively linked to nematode neuropeptide signaling  
62 via *in silico* approaches [19]; however, no experimental data are available which test these  
63 hypotheses.

64 Neuropeptides are well known neuromodulators of a wide array of essential neuronal functions in  
65 nematodes, including locomotion, reproduction and feeding [see 20 for review]. Despite biological  
66 importance, nematode neuropeptide signaling beyond the synaptic connectome is poorly  
67 understood. Indeed, the capability and characteristics of neuropeptide EVT in nematodes remain  
68 unreported, likely due to the lack of appropriate experimental and analytical tools for the  
69 investigation of extracellular communication via body fluid in nematodes including *C. elegans*.

70 The zoonotic gastrointestinal parasite *A. suum* offers a unique opportunity to probe extrasynaptic  
71 communication in nematodes. Adult *A. suum*, which are up to 30 cm in length, contain body cavity  
72 fluid (pseudocoelomic fluid, As-PCF) that maintains hydrostatic pressure, bathes internal organs  
73 and muscle systems, and provides an ideal vehicle for non-neuronal communication. In contrast  
74 to *C. elegans*, the size of adult *A. suum* facilitates routine collection of relatively large volumes  
75 (~500  $\mu$ l/nematode) of As-PCF for bioanalysis. This, in conjunction with the experimental  
76 tractability of *Ascaris*, where tissues and organs can be readily dissected for physiology studies  
77 [see 20], offers a unique opportunity to investigate EVT in nematodes.

78 This study exploits peptidomics, nematode physiology, and behavioral bioassays, heterologous  
79 expression and bioinformatic approaches to determine the role of nematode As-PCF in EVT of  
80 neuropeptides. We show that As-PCF contains a complex array of neuropeptides which modulate  
81 nematode behavior. Specifically, we demonstrate that: (i) neuropeptides in As-PCF include  
82 FMRFamide-like peptides (FLPs) and neuropeptide-like proteins (NLPs); (ii) As-FLP-18A  
83 (GFGDEMSPGVLR) is the dominant neuropeptide in As-PCF; (iii) As-PCF is bioactive on the  
84 reproductive muscle, altering activity *ex vivo* in a manner similar to that of synthetic As-FLP-18A;  
85 (iv) As-PCF activates the *C. elegans* FLP-18 receptors NPR-4 and -5 heterologously expressed in  
86 mammalian cells; (v) As-PCF and synthetic As-FLP-18A impact *C. elegans* behavior; and (vi) FLP-  
87 18 and the cognate receptors NPR-4 and -5 display pan-distribution across phylum Nematoda.  
88 This study provides the first direct experimental evidence that neuropeptide signaling can be  
89 mediated non-neuronally by EVT in nematodes. These novel data highlight that non-neuronal,  
90 long-range communication is a key facet of neuropeptide signaling in nematodes, adding a new  
91 dimension to the interpretation of functional data pertaining to the nematode nervous system.

92

## 93 **Results and discussion**

### 94 ***Ascaris* PCF contains a rich peptide library**

95 Liquid chromatography coupled with mass spectrometric (LC-MS/MS) analyses of As-PCF (n=24  
96 LC-MS/MS runs representing 67 individual worms; see Supplementary Data S1) reveals that  
97 multiple peptide families are present in nematode body cavity fluid. We queried the As-PCF  
98 peptidome with *A. suum* *in silico* peptide libraries (unpublished, constructed in-house) for the major  
99 nematode neuropeptide families [FLPs and neuropeptide like proteins (NLPs)], as well as  
100 antimicrobial peptides (AMPs). We detected 76 peptides in As-PCF of adult nematodes [41  
101 neuropeptides (6 FLPs, 35 NLPs and 35 AMPs; see Fig 1A and Supplementary Data 1 (S1)).  
102 High-confidence peptide spectrum matches were confirmed for 10 peptides [1% FDR; 21; see  
103 Table 1].

104 Our experimental approach involved peptidome analyses of single (n=20 worms; 20 LC-MS/MS  
105 runs) and pooled adult female (n=17 worms; one LC-MS/MS run) and pooled adult male As-PCF  
106 (3 LC-MS/MS runs: n=18, n=6, n=6, worms respectively). This strategy enabled comparison of  
107 both pooled and single-worm As-PCF samples, in addition to sex differences. Pooled As-PCF  
108 revealed a richer peptide complement than single As-PCF samples; 54 peptides were detected in  
109 the pooled sample (n=17 female worms) relative to  $17.75 \pm 1.2$  peptides detected in single worm  
110 samples (n=20 worms) (Fig 1B). Six peptides were detected in the pooled sample that were not  
111 identified from single worm samples (As-FLP-18D, As-FLP-18E, As-NLP-14N, As-NLP-66B, As-  
112 GRSP-2 and As-NLP-14K; see S1). These data indicate that, whilst pooled samples reveal As-  
113 PCF peptidome complexity, single worm As-PCF characterization also has utility as an  
114 experimental platform for the interrogation of key peptides which are consistently detected in  
115 individual worms (see 1% FDR peptides, Table 1 and S1). Male and female As-PCF comparisons  
116 revealed two peptides that were male As-PCF specific: As-NLP-43C and a novel FLP, As-FLP-35  
117 (ANTATASWSIEWLMRLNH<sub>2</sub>; see S1). As-FLP-35 is a novel FLP recently predicted from the *A.*  
118 *suum* genome [data unpublished; 22].

119 Antimicrobial Peptides were the most abundant family of peptides detected in the As-PCF (97% of  
120 AMP library predictions); As-Cecropin-1 and 2 [also known as P1 and P2 respectively; 23] were  
121 the most highly detected peptides in >96% of samples at >97% coverage (Fig 1A, C and Table 1).  
122 FLPs and NLPs displayed greater variability in both the frequency of detection and overall peptide  
123 coverage. However, most strikingly, As-FLP-18A equaled the frequency and coverage of the  
124 AMPs, dominating the As-PCF peptidome (detected in 92% of samples at >93% coverage; Fig 1A,  
125 C and S1). Whilst the number of NLPs detected was greater than the number of FLPs, the majority  
126 were low frequency (where approximately half of NLPs were detected only once) with the exception  
127 of As-NLP-21G and As-NLP-42C (detected in 42% and 46% of samples, respectively; see Fig 1A-  
128 D and S1).

129 This is the first experimental demonstration of neuropeptides in nematode body cavity fluid. This  
130 discovery represents a step-change in the understanding of nematode neuronal signaling and

131 requires that EVT should be considered in the interpretation and comprehension of nematode  
132 neurobiology.

133

134 **The As-PCF neuropeptidome is compelling in the context of *Caenorhabditis***  
135 ***elegans* neurobiology**

136 Neuropeptides are released into the body cavity fluid of invertebrates where they act as  
137 neurohormones to regulate many physiological functions [24]. A number of the peptides  
138 consistently detected in As-PCF in this study (FLP-18, NLP-21, -37, -40) have been reported in *C.*  
139 *elegans* in cells that link them to the PCF. For example NLP-21, -37 and -40 have been localized  
140 to *C. elegans* coelomocytes, which have roles in the endocytosis of secreted proteins from the PCF  
141 [11, 12, 25, 26]; this has also been observed for additional neuropeptides, e.g. INS-22 [25], that  
142 were not included in the custom peptide library used to probe the As-PCF peptidome in this study.  
143 Due to their localization in coelomocyte scavenger cells, it has been postulated that these peptides  
144 are released from dense core vesicles and endocytosed. However, until now, their presence in  
145 nematode PCF has not been substantiated. In addition, *C. elegans* NLP-37 (PDF-2) has been  
146 assigned a long-range neuromodulatory function via release into the PCF as observed for the  
147 *Drosophila* homologue [27-30]. The detection of NLP-37 in As-PCF provides evidence for a  
148 conserved neuromodulatory role in nematodes. Significantly, a neuromodulatory/neurohormonal  
149 role for FLP-18 has also previously been suggested [31]; localization data revealed a physical  
150 disconnect between neurons expressing FLP-18 and the location of FLP-18 cognate receptors.  
151 The consistent presence of As-FLP-18A in the As-PCF peptidome confirms the potential for FLP-  
152 18 peptides to modulate neurobiology via EVT in nematodes.

153 Based on indirect evidence, a role for EVT of neuropeptides in body cavity fluid has been  
154 hypothesised for both *A. suum* and *C. elegans* [9, 14, 19, 31]. However, the data presented here  
155 provide the first direct evidence for EVT by neuropeptides in As-PCF. Notably, As-PCF has a  
156 restricted peptidome relative to the predicted (*in silico*) whole worm peptidome, consistent with  
157 selective release of bioactive peptides into this compartment.

158

## 159 **As-FLP-18A dominates the *Ascaris* PCF neuropeptidome**

160 *As-flp-18* encodes six peptides that share a common C-terminal **PGVLRN-NH<sub>2</sub>** motif (As-FLP-18A,  
161 GFGDEMSPGVLRN-NH<sub>2</sub>; As-FLP-18B, GMPGVLRN-NH<sub>2</sub>; As-FLP-18C, AVPGVLRN-NH<sub>2</sub>; As-  
162 FLP-18D, GDVPGVLRN-NH<sub>2</sub>; As-FLP-18E, SDMPGVLRN-NH<sub>2</sub>; As-FLP-18F, SMPGVLRN-NH<sub>2</sub>).  
163 As-FLP-18A is the most frequently detected neuropeptide in As-PCF (92% of samples, >93%  
164 coverage; Fig 1C), which leads us to hypothesize that As-FLP-18 peptides play an important role  
165 in the *A. suum* PCF.

166 In our LC/MS analysis, we consistently detected a truncated form of As-FLP-18A  
167 (GFGDEMSPGVLR; see Fig 1D) lacking the C-terminal phenylalanine-amide motif required for  
168 biological activity (see Fig 2B). Whilst the detection of a truncated peptide could be an artefact of  
169 sample processing, we attempted to minimize this possibility as As-PCF was collected and  
170 processed rapidly and shipped under temperature-controlled conditions to limit proteolytic  
171 degradation. Enhanced detection of truncated As-FLP-18A could be a result of more-ready  
172 ionisation of the arginine residue (position -1) in comparison to the intact As-FLP-18A (C-terminal  
173 phenylalanine-amide motif). Interestingly, in the pooled As-PCF samples we also detected As-  
174 FLP-18D and As-FLP-18E in addition to As-FLP-18A. In these samples, As-FLP-18D and E were  
175 also detected in the truncated form without the expected C-terminal phenylalanine-amide motif.  
176 Detection of these additional As-FLP peptides in pooled samples, but not in individual worm As-  
177 PCF, suggests that these peptides are present at lower concentrations, nearing the LC/MS limit of  
178 detection. An alternative hypothesis is that the truncated forms of As-FLP-18A, D and E are  
179 produced post-interaction with As-FLP-18 receptors in a signal termination event. Indeed, the E/S  
180 products and PCF of nematodes including *A. suum* are known to be peptidase-rich and include a  
181 range of cysteine proteases [32-35]. These peptidases may be selectively released at the target  
182 receptor to spatiotemporally control peptide interactions and mediate neuropeptide action [36]. In  
183 this scenario, peptidase action could manifest in an elevation, and thus an enhanced detection, of  
184 truncated versus intact As-FLP-18 peptides. This is consistent with our observations and would  
185 contribute to the plasticity of nematode neuronal signaling via EVT. The biological reason for the  
186 predominance of As-FLP-18A over the additional five peptides encoded by *As-flp-18* is unclear.

187 Indeed, *As-flp-18* is not predicted to be differentially spliced in *A. suum* as revealed by both  
188 genome-level analyses and molecular (PCR) investigation (data not shown). Regardless,  
189 truncated As-FLP-18A (synthetic) lacks biological activity in *A. suum* muscle physiology assays in  
190 contrast to intact As-FLP-18A (synthetic) and As-PCF, which both induce characteristic FLP-18  
191 responses (see subsequent discussion and Fig 2A and B). These data strongly suggest that both  
192 the intact and truncated form of As-FLP-18A are present in As-PCF.

193

### 194 **The bioactivity of *Ascaris* PCF on *Ascaris* reproductive tissue mirrors that of** 195 **synthetic As-FLP-18A**

196 Neuropeptides potently modulate the intrinsic muscle activity of *Ascaris* reproductive organs  
197 [ovijector; 37, 38-42] defined by five distinct response types (RT-1-RT5), ranging from inhibition of  
198 muscle contraction (flaccid paralysis, e.g., RT-1) to increased contraction frequency [e.g. RT5; 38].  
199 As-PCF also potently modulates *Ascaris* reproductive muscle activity. Exogenously applied As-  
200 PCF induces two distinct myoactivity profiles on the ovijector that are characteristic of either an RT-  
201 1- or RT-2 like response [38; see Figure 2B]. At low concentrations [0.015X As-PCF (where 1X  
202 As-PCF represents the native biological sample)], As-PCF consistently inhibits muscle activity in  
203 an RT-1 like response [Fig 2A; Supplementary Table 1 (S1 Table)]. At higher concentrations  
204 ( $\geq 0.15X$  As-PCF), the response profile included both RT-1 (inhibitory; 50% of preparations) and  
205 RT-2 like responses (excitatory; 50% of preparations) (see Fig 2A; S1 Table). All effects were  
206 reversible upon As-PCF washout.

207 Interestingly, in this study we present myoactivity profiles for As-PCF that are consistent with the  
208 myoactivity profile of synthetic As-FLP-18A which is also the dominant As-PCF peptide. Synthetic  
209 As-FLP-18A induces consistent excitatory effects (10 nM-1  $\mu$ M) that include transient muscle  
210 contraction followed by muscle paralysis [1  $\mu$ M; RT-2 like; Fig 2B; Supplementary Table 2 (S2  
211 Table)] [38]. At high concentrations (10  $\mu$ M) synthetic As-FLP-18A induces two distinct  
212 myoexcitatory profiles that resemble those observed with high concentrations of As-PCF (RT-1 like,  
213 64.2% of preparations; RT-2 like, 35.7% of preparations; see Fig 2B and S2 Table). These



214 responses were corroborated in synthetic peptide positive controls subjected to the same  
215 experimental manipulations as As-PCF (Fig 2B; S2 Table).

216 As-FLP-18 peptides (PGVLRFNH<sub>2</sub>) have been implicated in locomotion, feeding and reproductive  
217 function via whole worm, pharyngeal and ovijector tissue bioassays [see 20]. However, although  
218 *As-flp-18* encoded peptides are potent stimulators of the *Ascaris* ovijector, their expression pattern  
219 is limited to neurons that are anatomically distinct from, and have no known synaptic connections  
220 to, reproductive tissue [as demonstrated by in situ hybridization and MS/MS; 43]. The ovijector  
221 receives input from two parallel neuronal cell bodies situated in close proximity to the body wall and  
222 the ventral nerve cord (similar positions to *C. elegans* VC4 and VC5) [37]. In this study, RNAseq  
223 analysis was conducted on two distinct tissue types: (i) the gonopore region, an area of body wall  
224 tissue which contains the neuronal cell bodies which innervate the ovijector and; (ii) the ovijector  
225 itself which expresses the post-synaptic receptors. Our tissue-specific differential expression  
226 analyses of *As-flp-18* and the As-FLP-18 cognate GPCR sequelogs *As-npr-4* and *As-npr-5* [13,  
227 31, 44], revealed that the neuronal cell bodies innervating the ovijector do not express *As-flp-18*  
228 despite the presence of both cognate receptors in the ovijector tissue (unpublished data manuscript  
229 in preparation). These data support the hypothesis that As-PCF-circulating neuropeptides  
230 modulate *A. suum* reproductive function. Whilst our data point towards a significant role for As-  
231 FLP-18A in modulating reproductive function via EVT, the contribution of other peptides detected  
232 in the As-PCF will require further investigation to unravel EVT dynamics.

233

### 234 ***Ascaris* PCF activates heterologously expressed *Caenorhabditis elegans*** 235 **NPR-4 and NPR-5**

236 To characterize the interaction of As-PCF with the cognate FLP-18 receptors NPR-4 and -5, and  
237 to provide further evidence for As-FLP-18 signaling via EVT, we measured the response of Ce-  
238 NPR-4 and -5 (expressed in CHO cells) to As-PCF and synthetic As-FLP-18 peptides. Note that  
239 attempts to express As-NPR-4 and -5 in the heterologous CHO system were unsuccessful in this  
240 study [consistent with difficulties in parasitic nematode GPCR heterologous expression; see 20 for  
241 review], requiring the use of the *C. elegans* receptors as surrogates. As-PCF and synthetic As-

242 FLP-18 peptides potentially activated Ce-NPR-4 and -5 (synthetic Ce-FLP-18 peptides also elicited  
243 the expected responses; see Figs 3A-C). Synthetic As-FLP-18A-E elicited significant  $Ca^{2+}$   
244 responses in cells transfected with *C. elegans* NPR-4 and cells transfected with NPR-5, compared  
245 to the negative control (cell medium without peptide; see Fig 3A). Synthetic As-FLP-18 peptides  
246 did not evoke significant  $Ca^{2+}$  responses in CHO cells transfected with an empty vector, confirming  
247 that Ce-NPR-4 and -5 mediate the observed physiological responses (Fig 3A). As-PCF also  
248 evoked a significant  $Ca^{2+}$  response in Ce-NPR-4 or Ce-NPR-5 transfected cells compared to  
249 negative controls (see Figs 3B and C). A low-level  $Ca^{2+}$  response was observed in cells transfected  
250 with an empty control vector as well, indicating that some component(s) of As-PCF interact with  
251 receptors endogenously expressed in CHO cells (see Figs 3B and C). Despite this, As-PCF elicited  
252 a significantly higher response in cells expressing Ce-NPR-4 or -5 than the negative control (empty  
253 vector transfected CHO cells), indicating that a significant component of the As-PCF response is  
254 specific to Ce-NPR-4 and -5 activation (see Fig 3B and C respectively).

255 The activation of heterologously expressed Ce-NPR-4 and -5 by As-PCF and synthetic As-FLP-18  
256 peptides provides data that verifies conservation of the FLP-18 interaction with NPR-4 and -5 [31,  
257 44] in *Ascaris* and supports our hypothesis that As-PCF peptides interact with putative FLP-18  
258 receptors *in vivo* via EVT.

259

## 260 ***Ascaris* PCF impacts *Caenorhabditis elegans* growth, reproduction and**

### 261 **locomotion**

262 To further investigate the biological activity of As-PCF in nematodes we examined the effects of  
263 As-PCF and synthetic As-FLP-18A in *C. elegans* using three behavioral assays which assess  
264 nematode growth (body length), reproduction (progeny) and motility (locomotory activity) [45, 46]  
265 in *Ce-acs-20* [cuticle defective mutant to facilitate peptide uptake; 47]. *Caenorhabditis elegans*  
266 growth was potentially inhibited in a dose-dependent manner by 2% and 5% As-PCF; this effect was  
267 mirrored by treatment of *C. elegans* with the dominant As-PCF neuropeptide As-FLP-18A (100  $\mu$ M,  
268 synthetic peptide) (see Fig 4A). In addition, As-PCF dose-dependent effects on reproduction were  
269 also evident, where progeny was reduced in the presence of 1, 2 and 5% As-PCF; these effects

270 were also evident in nematodes treated with 100  $\mu$ M synthetic As-FLP-18A (see Fig 4B).  
271 *Caenorhabditis elegans* motility was significantly impaired in the presence of 5, 7.5 and 10% As-  
272 PCF as measured by the wMicroTracker (InVivo Biosystems, Oregon, USA); synthetic As-FLP-18A  
273 (10  $\mu$ M) also produced significant inhibition of locomotion (see Fig 4C). In all assays the As-PCF  
274 induced modulation of *C. elegans* behavior was consistent with that observed for the synthetic As-  
275 FLP-18A peptide (see Fig 4A-C) and corresponds to published literature which demonstrates the  
276 modulatory activity of FLP-18 in a number of *C. elegans* behaviors and biological processes [see  
277 48 for review].

278

### 279 ***flp-18* and the cognate receptors, *npr-4* and *npr-5*, display pan-phylum** 280 **conservation in nematodes**

281 *In silico* analyses of 134 available nematode genomes, representing 109 species, 7 Clades and 3  
282 distinct lifestyles [free-living, animal parasitic and plant parasitic; 49, 50, 51], demonstrates striking  
283 *flp-18* pan-phylum conservation in 99% of nematode species [see Fig 5 Supplementary Data 2  
284 (S2)]. *flp-18* is the only neuropeptide gene which displays this level of conservation in phylum  
285 Nematoda (unpublished data). These data drive the hypothesis that FLP-18 peptides are  
286 fundamental to nematode biology and support the potential for FLP-18 signaling via EVT to be a  
287 pan-phylum trait.

288 Broad conservation was also noted for the putative FLP-18 receptor encoding genes (*npr-4* in 93%  
289 of species and *npr-5* in 84% of species; see Fig 5), highlighting their importance across phylum  
290 Nematoda. It is interesting to note that, for most of the species examined (98%), the presence of  
291 the FLP-18-encoding gene was indicative of the presence of either putative cognate receptor or  
292 both and *vice versa* (Fig 5). These data suggest that the FLP-18-NPR-4/5 interaction, which has  
293 been functionally validated in *C. elegans*, *Brugia malayi* [31, 44] and, in this study, in *A. suum*, is  
294 highly conserved across nematodes; consequently these receptors hold significant appeal as  
295 broad-spectrum drug targets in parasitic nematodes.

296

## 297 **Conclusions**

298 This study reveals a rich neuropeptide profile in the body cavity fluid of a parasitic nematode and,  
299 for the first time, provides direct evidence that EVT is an integral part of the nematode functional  
300 connectome. These data demonstrate that nematode signaling systems operate within a  
301 connectome comprising both wired and wireless components, adding complexity and plasticity to  
302 nematode communication frameworks. The biological significance and exploitation of the  
303 nematode connectome is significantly enhanced by the wireless data presented here. The  
304 combined network infrastructure revealed the experimental tractability of *A. suum* in this study  
305 provides a unique and powerful tool to unravel the intricacies of information flow within the nervous  
306 system of nematodes and higher organisms.

307

## 308 **Materials and methods**

### 309 **Collection and maintenance of *Ascaris suum***

310 Adult *A. suum* were collected at a local abattoir (Karro Food Group Ltd, Cookstown, Northern  
311 Ireland), transported to the laboratory in saline (0.9% NaCl), and were maintained in *Ascaris*  
312 Ringers Solution (ARS: 13.14 mM NaCl, 9.47 mM CaCl<sub>2</sub>, 7.83 mM MgCl<sub>2</sub>, 12.09 mM C<sub>4</sub>H<sub>11</sub>NO<sub>3</sub>/Tris,  
313 99.96 mM NaC<sub>2</sub>H<sub>3</sub>O<sub>2</sub>, 19.64 mM KCl, pH 7.8) at 37 °C until use.

314

### 315 **Maintenance of *Caenorhabditis elegans*.**

316 The *C. elegans* cuticle defective mutant strain *acs-20* [tm3232; 47] was obtained from the National  
317 BioResource Project of the Tokyo Women's Medical University (Tokyo, Japan). *Ce-acs-20* have  
318 defects in the cuticle barrier which increase permeability to small molecules [47]. *Ce-acs-20* were  
319 maintained on Nematode Growth Media (NGM) plates seeded with *Escherichia coli* OP50 (CGC)  
320 and synchronized using established methods [52].

321

### 322 ***Ascaris suum* pseudocoelomic fluid collection**

323 As-PCF collection from adult *A. suum* was carried out within 3 hrs of parasite collection. Female  
324 worms >20 cm were used in experiments. Between 400 and 1000  $\mu$ l of As-PCF was collected from  
325 each female worm and between 100 and 500  $\mu$ l of As-PCF was collected from each male worm.  
326 As-PCF was obtained from blot-dried (Kimwipes, Fisher Scientific, UK) female worms by holding  
327 the specimen vertically above a 2 ml low binding microcentrifuge tube (Fisher Scientific, UK) and  
328 carefully snipping <3 mm tissue from the tail (posterior to the anal pore and the major ganglia) using  
329 a pair of sterile scissors. AS-PCF was discharged from the worm into the collection tube with the  
330 aid of internal turgor pressure and gentle manual compression. Male As-PCF was collected by  
331 drying the cuticle and making a 1 cm incision with a sharp scalpel approximately 5 cm posterior to  
332 the head (mid body region) and allowing turgor pressure to discharge As-PCF into a 2 ml collection  
333 tube; male worms are not amenable to female worm As-PCF collection processes due to the close  
334 proximity of male reproductive organs at the posterior tip of the tail which prevents access to the  
335 pseudocoelomic cavity. As-PCF was placed on ice immediately after collection. Single worm As-  
336 PCF (n=24) and pooled As-PCF analyses (n=17 worms pooled) were conducted for female worms.  
337 Male single worm As-PCF analysis was not possible due to the low volume of As-PCF retrieved  
338 from individual male worms; As-PCF collected from 30 males was used in pooled analyses

339

#### 340 **LC-MS/MS**

341 *Peptide extraction:* Peptide extraction was carried out in two stages. Phase one was conducted at  
342 Queen's University Belfast immediately following As-PCF collection; phase two was conducted at  
343 the University of Wisconsin-Madison, WI, USA. *Phase one:* As-PCF was spiked with an equal  
344 volume of acidified methanol (90% MeOH, 9% ddH<sub>2</sub>O, 1% glacial CH<sub>3</sub>COOH) immediately following  
345 collection (to extract peptides and precipitate large proteins), vortexed and centrifuged for 15 min  
346 at 20,000 *g*. The supernatant was retained in a 2 ml low binding microcentrifuge tube (Fisher  
347 Scientific, UK). The pellet was resuspended in 500  $\mu$ l acidified methanol using a sterile plastic  
348 pestle. This was repeated twice more and the supernatant from each extraction was retained as  
349 above in addition to the final pellet. 250  $\mu$ l ddH<sub>2</sub>O was added to the supernatant solutions from  
350 extractions 2 and 3 to decrease MeOH concentration to 60%. All three supernatant solutions and

351 the final pelleted solids remaining after the third extraction were snap frozen in liquid N<sub>2</sub> and stored  
352 at -80 °C prior to shipping. *Phase two:* upon receipt (University of Wisconsin, Madison), frozen  
353 supernatant was thawed and loaded immediately onto a 10 kDa molecular weight cut-off membrane  
354 (Sigma-Aldrich, St. Louis, MO) which was rinsed with 0.1 M NaOH and 50/50 MeOH/H<sub>2</sub>O, (v/v)  
355 prior to sample loading. The tube holding the membrane was centrifuged at 14,000 g for 10 min  
356 and the filtrate was dried in a SpeedVac concentrator (Thermo Fisher Scientific, Waltham, MA,  
357 USA). The purified sample was resuspended in 150 µl 0.1% formic acid (FA) in H<sub>2</sub>O, desalted by  
358 OMIX C18 pipette tips (Agilent Technologies, Santa Clara, CA) and finally eluted into 0.1% FA in  
359 50/50 ACN/H<sub>2</sub>O (v/v). The eluate was concentrated until dry and stored at -80 °C. *LC-MS/MS*  
360 *analysis:* Stored samples were dissolved in 10 µl 0.1% formic acid (FA). Nano LC-MS/MS/MS  
361 analysis was carried out using a Waters Nano-Acquity Ultra Performance LC system (Waters Corp,  
362 Milford, MA, USA) coupled to a Q-Exactive Quadrupole-Orbitrap mass spectrometer (Thermo  
363 Scientific Bremen, Germany). A self-packed column (150 mm length of 1.7 µm C18 with a 3 µm  
364 C18 cap) was used for chromatographic separation. The mobile phase involved in online  
365 separation was: A, 0.1% FA in H<sub>2</sub>O and B, 0.1% FA in ACN. A 120-min gradient was applied at  
366 flow rate of 0.3 µl/min, starting from 100% A. Mobile phase B increased to 10% in 1 min, 35% at  
367 90 min, 95% at 92 min. The gradient remained at 5% A for 10 min, then recovered to 100% A at  
368 105 min. Data were collected under positive electrospray ionization data-dependent mode (DDA),  
369 with the top 15 abundant precursor ions selected for HCD fragmentation with listed settings: full-  
370 MS, resolution, 70,000; automatic gain control (AGC), 1e6; scan range, m/z 200-2000; dd-MS<sup>2</sup>,  
371 resolution 17,500; AGC, 2e5; isolation window, m/z 2.0; fixed first mass, m/z 100.0; normalized  
372 collision energy, 30. Other typical MS parameters were: spray voltage, 2.1 kV; no sheath and  
373 auxiliary gas flow; heated capillary temperature, 275 °C. *MS data analysis:* Parent mass error  
374 tolerance was 10 ppm and fragment mass error tolerance was 0.02 Da. C-terminal amidation,  
375 methionine oxidation and pyro-glutamation were specified as variable post-translational  
376 modification (PTMs). No enzyme cleavage was selected within the de novo sequencing. A custom  
377 neuropeptide database representing predicted *A. suum* FLPs, NLPs and AMPs was used in the  
378 search process. A threshold of false discovery rate (FDR) of 1% was used for data filtration and

379 validation. NanoLC-ESI-MS raw data were analyzed by PEAKS Studio 7 (Bioinformatics Solution  
380 Inc., Waterloo, ON, Canada).

381

### 382 ***Ascaris suum* ovijector bioassays**

383 *Tissue excision and data collection:* Adult female *A. suum* ovijector tissue and data collection was  
384 carried out as previously described [41]. Briefly, freshly excised *A. suum* ovijector tissue was  
385 attached to the recording apparatus and synthetic peptide or As-PCF were added directly to the  
386 chamber following tissue equilibration. Muscle activity was recorded for 10 min. Media in the  
387 recording chamber was then replaced with fresh HBSS (37°C; Sigma-Aldrich), and the muscle  
388 allowed to recover for a further 10 min. If regular baseline activity was achieved following washout  
389 further experiments with the specimen were conducted. *FLP-18 bioassays:* *A. suum* synthetic FLP-  
390 18 peptide [As-FLP-18A, GFGDEMSMPGVLRFNH<sub>2</sub>; Genosphere Biotechnologies (France)] was  
391 tested for bioactivity on ovijector tissue. Peptide stock solutions (10 mM – 1 µM) were prepared  
392 using ddH<sub>2</sub>O such that 4 µl peptide stock solution was added to 4 ml HBSS in the recording  
393 chamber to achieve the desired final peptide concentration (10 - 0.001 µM). ddH<sub>2</sub>O was used as  
394 a negative control. *As-PCF bioassays:* 3 ml fresh As-PCF was collected from female worms (as  
395 described above) and passed through a Sep-Pak® Classic C18 cartridge (Waters, Ireland). Sep-  
396 Pak® Classic C18 cartridges were activated with 3 ml activation solution (3 ml Ultrapure Acetonitrile,  
397 0.1 % HPLC grade trifluoroacetic acid) and washed with 6 ml wash solution (6 ml ddH<sub>2</sub>O, 0.1 %  
398 HPLC grade trifluoroacetic acid). Following initial flow through, As-PCF effluent was passed  
399 through the C18 cartridge twice more to ensure optimal peptide binding. C18 cartridges were then  
400 washed using 6 ml wash solution and peptides were eluted in 3 ml activation solution. All samples  
401 were dried overnight using a Genevac™ MiVac concentrator at 37°C and stored at 4°C until use.  
402 Samples were resuspended in 200 µl ddH<sub>2</sub>O immediately before use. Controls included  
403 phosphate-buffered saline (PBS; 150 mM NaCl, 0.025 M NaH<sub>2</sub>PO<sub>4</sub>·2H<sub>2</sub>O, 0.075 M Na<sub>2</sub>HPO<sub>4</sub>, pH  
404 7.4) spiked with synthetic As-FLP-18A (PBS-As-FLP-18 SB; 100 µM) before C18 perfusion, PBS  
405 spiked with synthetic As-FLP-18A after C18 perfusion (PBS-As-FLP-18 SA; 100 µM), and perfused  
406 activation solution only (resuspended in ddH<sub>2</sub>O; negative control). 4 or 40 µl As-PCF [15X



407 concentrated; final concentration in recording chamber 0.015X and 0.15X As-PCF respectively  
408 (where 1X As-PCF represents the native biological sample)], PBS-As-FLP-18 SB (final  
409 concentration in recording chamber 0.1  $\mu$ M or 1  $\mu$ M), or PBS-As-FLP-18 SA (final concentration in  
410 recording chamber 0.1  $\mu$ M or 1  $\mu$ M) were added to the recording chamber (n=4) and effects on  
411 ovjector muscle recorded. All data were analyzed as described [41]. Statistical analyses included  
412 repeated measures ANOVA and Student's *t*-test to assess the significance of test  
413 substance/peptide effects and effect reversal after washout, respectively (see Fig 2).

414

### 415 **Cell-culture activation assays for *Caenorhabditis elegans* receptors**

416 GPCR activation assay was performed as previously described [17, 53]. Briefly, mammalian CHO  
417 K1 cells stably overexpressing apo-aequorin and human  $G\alpha_{16}$  (ES-000-A24, PerkinElmer) were  
418 transiently transfected with *Ce-npr-4a*/pcDNA3.1, *Ce-npr-5a*/pcDNA3.1 or empty pcDNA3.1  
419 (negative control) plasmid using Lipofectamine LTX and Plus reagent (Invitrogen, UK). After  
420 transfection, cells were grown in culture flasks overnight at 37 °C, after which they were transferred  
421 to 28 °C and allowed to incubate for 24 h. On the day of the assay, CHO cells were harvested and  
422 loaded with Coelenterazine H (Invitrogen) for 4 h at room temperature, which elicits the formation  
423 of the  $Ca^{2+}$ -sensitive photoprotein aequorin. As-PCF or synthetic peptides (As-FLP-18 or Ce-FLP-  
424 18) dissolved in DMEM/BSA medium were added to cells and luminescence measured for 30 s at  
425 496 nm using a Mithras LB940 luminometer (Berthold Technologies, Germany). After 30 s of  
426 readout, 0.1% Triton X-100 was added to lyse the cells, resulting in a maximal  $Ca^{2+}$  response that  
427 was measured for 10 s. Note that *C. elegans* synthetic peptides were synthesized by Thermo  
428 Scientific and *A. suum* synthetic peptides were synthesized by Genosphere Biotechnologies  
429 (France), all peptides were tested at a final concentration of 10  $\mu$ M. The final concentration of As-  
430 PCF was half the concentration of the undiluted sample. In addition, a 10-fold dilution series  
431 ranging from 1/20 to 1/2000 of the undiluted As-PCF sample was tested. Assays were performed  
432 in triplicate on at least two different days.

433

### 434 ***Caenorhabditis elegans* bioassays**



435 *Body length assay:* *C. elegans* body size assays were carried out as previously described [45].  
436 Nematodes were treated with either 1, 2 or 5% As-PCF [diluted in S-medium, 1 L S Basal, 10 ml 1  
437 M potassium citrate pH 6.0, 10 ml trace metals solution, 3 ml 1 M CaCl<sub>2</sub>, 3 ml 1 M MgSO<sub>4</sub>] [52], 10  
438 μM synthetic As-FLP-18A [positive control; Genosphere Biotechnologies (France)] or S-medium  
439 (negative control; n>9 nematodes per treatment). Following incubation at 20°C for 96 hr  
440 nematodes were immobilized in M9 buffer containing 50 mM sodium azide (NaN<sub>3</sub>) and body length  
441 was calculated using a Leica MZ 12.5 stereomicroscope, Unibrain Fire-i digital camera and ImageJ  
442 software [54]. *Brood size assay:* Five L4 *C. elegans* were transferred into one well of a 24-well  
443 plate containing either 1, 2 or 5% As-PCF (diluted in S-medium), 10 μM synthetic As-FLP-18A  
444 (positive control) or S-medium (negative control) and supplemented with *E. coli* OP50 to a final  
445 volume of 1 ml (n=4 wells/treatment). Brood size was calculated by counting the number of progeny  
446 in each well after 96 hr at 21°C [46]. *wMicroTracker motility assay:* 50 L4 *C. elegans* in M9 buffer  
447 were added to each well of a 96-well plate along with *E. coli* OP50 (OD<sub>600nm</sub> of 1) to a final volume  
448 of 90 μl. Basal locomotory activity was recorded for 1 hr using the wMicroTracker (InVivo  
449 Biosystems, Oregon, USA) with a bin size of 30 mins. After 1 hr each well was supplemented with  
450 10 μl 1, 2, 5, 7.5 or 10% As-PCF (diluted in M9), M9 buffer (negative control) or 10 μM synthetic  
451 As-FLP-18A (positive control) (n>4 wells/treatment). Nematode locomotory activity was recorded  
452 for a further 12 hrs. Data were analyzed using GraphPad Prism version 8. Statistical significance  
453 was determined by one-way ANOVA and Dunnett's multiple comparisons test or two-way ANOVA  
454 and Tukey's multiple comparisons test.

455

#### 456 ***In silico* identification of *flp-18*, *npr-4* and *-5***

457 Putative nematode *flp-18*, *npr-4* and *npr-5* orthologs were identified from WormBase ParaSite  
458 version 14 [<https://parasite.wormbase.org/index.html>; 49, 50, 51] and aligned using CLUSTAL  
459 Omega [default settings; 55]. Alignments were subsequently used to construct Hidden Markov  
460 Models (HMM) using HMMER v3.2 [default hmmbuild parameters; 56] based on methods  
461 previously described [57]. *hmmsearch* (default settings) was employed to identify potential *flp-18*,  
462 *npr-4* and *npr-5* sequences within the predicted protein datasets of 109 nematode species [134

463 genomes, see Supplementary Data 2 (SD2); 51]. The putative *npr-4* and *-5* sequences identified  
464 via *hmmsearch* were then used as queries in BLASTp searches in the NCBI non-redundant *C.*  
465 *elegans* predicted protein database (<https://blast.ncbi.nlm.nih.gov>; default settings). The putative  
466 *flp-18* sequences identified via *hmmsearch* were confirmed visually via the presence of the  
467 conserved PGXXRFG C-terminal motif. Queries that failed to return a putative target gene as the  
468 highest scoring pair/top hit were excluded from downstream analyses. Genomes lacking putative  
469 target gene hits were subjected to manual BLASTp and tBLASTn using WormBase ParaSite  
470 version 14 and *C. elegans flp-18*, *npr-4* and *npr-5* as query sequences. Additionally, orthologs from  
471 the most closely related nematode species were also used as queries in BLASTp/ tBLASTn  
472 searches.

473

#### 474 **Statistical analysis**

475 All statistical analyses were performed using GraphPad Prism Version 8. Statistical tests included  
476 one-way ANOVA (Dunnett's multiple comparisons test), two-way ANOVA (Tukey's multiple  
477 comparisons test), repeated measures ANOVA and Student's *t*-test. LC-MS/MS data were  
478 analyzed using PEAKS Studio 7 (Bioinformatics Solution Inc., Waterloo, ON, Canada)

479

#### 480 **Acknowledgments**

481 Authors thank Dr Brett Greer for technical assistance/equipment and Sorcha Donnelly for  
482 assistance with As-PCF collection. The authors are grateful to Karro, Cookstown, NI for the  
483 assistance in the collection of nematodes. The authors acknowledge support for this work from:  
484 Biotechnology and Biological Sciences Research Council/Boehringer Ingelheim grant  
485 BB/MO10392/1 (AM, NJM and AGM); Department for Education Northern Ireland (DfE)  
486 Studentship (FMcK); Department of Agriculture Environment and Rural Affairs Northern Ireland  
487 (DAERA) Studentship (AI); National Institutes of Health (NIH, USA) grant GM097435 (MM);  
488 National Institutes of Health (NIH, USA) grants R01DK071801 and S10RR029531 (LL); Research  
489 Foundation Flanders (FWO) grant G0C0618N (IB).

490

## 491 **References**

- 492 1. White JG, Southgate E, Thomson JN, Brenner S. The structure of the nervous system of  
493 the nematode *Caenorhabditis elegans*. *Philos Trans R Soc Lond B Biol Sci.* 1986;314(1165):1-  
494 340. Epub 1986/11/12. doi: 10.1098/rstb.1986.0056. PubMed PMID: 22462104.
- 495 2. Cook SJ, Jarrell TA, Brittin CA, Wang Y, Bloniarz AE, Yakovlev MA, et al. Whole-animal  
496 connectomes of both *Caenorhabditis elegans* sexes. *Nature.* 2019;571(7763):63-71. Epub  
497 2019/07/05. doi: 10.1038/s41586-019-1352-7. PubMed PMID: 31270481.
- 498 3. Albertson DG, Thomson JN. The pharynx of *Caenorhabditis elegans*. *Philos Trans R Soc*  
499 *Lond B Biol Sci.* 1976;275(938):299-325. Epub 1976/08/10. doi: 10.1098/rstb.1976.0085.  
500 PubMed PMID: 8805.
- 501 4. Stretton AOW, Maule AG. Chapter 6 - The Neurobiology of *Ascaris* and Other Parasitic  
502 Nematodes. In: Holland C, editor. *Ascaris: The Neglected Parasite.* Amsterdam: Elsevier; 2013.  
503 p. 127-52.
- 504 5. Bargmann CI. Beyond the connectome: how neuromodulators shape neural circuits.  
505 *Bioessays.* 2012;34(6):458-65. Epub 2012/03/08. doi: 10.1002/bies.201100185. PubMed PMID:  
506 22396302.
- 507 6. Brezina V. Beyond the wiring diagram: signalling through complex neuromodulator  
508 networks. *Philosophical transactions of the Royal Society of London Series B, Biological*  
509 *sciences.* 2010;365(1551):2363-74. doi: 10.1098/rstb.2010.0105. PubMed PMID: 20603357.
- 510 7. Liang Z, Schmerberg CM, Li L. Mass spectrometric measurement of neuropeptide  
511 secretion in the crab, *Cancer borealis*, by in vivo microdialysis. *Analyst.* 2015;140(11):3803-13.  
512 Epub 2014/12/30. doi: 10.1039/c4an02016b. PubMed PMID: 25537886; PubMed Central PMCID:  
513 PMCPMC4837892.
- 514 8. Jekely G, Melzer S, Beets I, Kadow ICG, Koene J, Haddad S, et al. The long and the  
515 short of it - a perspective on peptidergic regulation of circuits and behaviour. *J Exp Biol.*  
516 2018;221(Pt 3). Epub 2018/02/14. doi: 10.1242/jeb.166710. PubMed PMID: 29439060.
- 517 9. Smart D, Shaw C, Johnston CF, Halton DW, Fairweather I, Buchanan KD.  
518 Chromatographic and immunological characterisation of neuropeptide Y-like and pancreatic  
519 polypeptide-like peptides from the nematode *Ascaris suum*. *Comp Biochem Physiol C.*  
520 1992;102(3):477-81. Epub 1992/07/01. PubMed PMID: 1360356.
- 521 10. Laurent P, Ch'ng Q, Jospin M, Chen C, Lorenzo R, de Bono M. Genetic dissection of  
522 neuropeptide cell biology at high and low activity in a defined sensory neuron. *Proc Natl Acad Sci*  
523 *U S A.* 2018;115(29):E6890-e9. Epub 2018/07/01. doi: 10.1073/pnas.1714610115. PubMed  
524 PMID: 29959203; PubMed Central PMCID: PMCPMC6055185.
- 525 11. Wang H, Girsakis K, Janssen T, Chan JP, Dasgupta K, Knowles JA, et al. Neuropeptide  
526 secreted from a pacemaker activates neurons to control a rhythmic behavior. *Curr Biol.*  
527 2013;23(9):746-54. Epub 2013/04/16. doi: 10.1016/j.cub.2013.03.049. PubMed PMID: 23583549;  
528 PubMed Central PMCID: PMCPMC3651789.
- 529 12. Sieburth D, Madison JM, Kaplan JM. PKC-1 regulates secretion of neuropeptides. *Nat*  
530 *Neurosci.* 2007;10(1):49-57. Epub 2006/11/28. doi: 10.1038/nn1810. PubMed PMID: 17128266.
- 531 13. Rogers C, Reale V, Kim K, Chatwin H, Li C, Evans P, et al. Inhibition of *Caenorhabditis*  
532 *elegans* social feeding by FMRFamide-related peptide activation of NPR-1. *Nat Neurosci.*  
533 2003;6(11):1178-85. Epub 2003/10/14. doi: 10.1038/nn1140. PubMed PMID: 14555955.
- 534 14. Komuniecki R, Hapiak V, Harris G, Bamber B. Context-dependent modulation  
535 reconfigures interactive sensory-mediated microcircuits in *Caenorhabditis elegans*. *Curr Opin*  
536 *Neurobiol.* 2014;29:17-24. Epub 2014/05/09. doi: 10.1016/j.conb.2014.04.006. PubMed PMID:  
537 24811318.
- 538 15. Chase DL, Koelle MR. Biogenic amine neurotransmitters in *C. elegans*. *WormBook.*  
539 2007:1-15. Epub 2007/12/01. doi: 10.1895/wormbook.1.132.1. PubMed PMID: 18050501;  
540 PubMed Central PMCID: PMCPMC4781333.

- 541 16. Chew YL, Tanizawa Y, Cho Y, Zhao B, Yu AJ, Ardiel EL, et al. An Afferent Neuropeptide  
542 System Transmits Mechanosensory Signals Triggering Sensitization and Arousal in *C. elegans*.  
543 *Neuron*. 2018;99(6):1233-46.e6. Epub 2018/08/28. doi: 10.1016/j.neuron.2018.08.003. PubMed  
544 PMID: 30146306; PubMed Central PMCID: PMC6162336.
- 545 17. Beets I, Janssen T, Meelkop E, Temmerman L, Suetens N, Rademakers S, et al.  
546 Vasopressin/oxytocin-related signaling regulates gustatory associative learning in *C. elegans*.  
547 *Science*. 2012;338(6106):543-5. Epub 2012/11/01. doi: 10.1126/science.1226860. PubMed  
548 PMID: 23112336.
- 549 18. Chase DL, Pepper JS, Koelle MR. Mechanism of extrasynaptic dopamine signaling in  
550 *Caenorhabditis elegans*. *Nat Neurosci*. 2004;7(10):1096-103. Epub 2004/09/21. doi:  
551 10.1038/nn1316. PubMed PMID: 15378064.
- 552 19. Bentley B, Branicky R, Barnes CL, Chew YL, Yemini E, Bullmore ET, et al. The Multilayer  
553 Connectome of *Caenorhabditis elegans*. *PLoS Comput Biol*. 2016;12(12):e1005283. Epub  
554 2016/12/17. doi: 10.1371/journal.pcbi.1005283. PubMed PMID: 27984591; PubMed Central  
555 PMCID: PMC615746 GlaxoSmithKline; he holds stock in GSK. The authors have declared  
556 that no competing interests exist.
- 557 20. McCoy CJ, Atkinson LE, Robb E, Marks NJ, Maule AG, Mousley A. Tool-Driven  
558 Advances in Neuropeptide Research from a Nematode Parasite Perspective. *Trends Parasitol*.  
559 2017;33(12):986-1002. Epub 2017/10/08. doi: 10.1016/j.pt.2017.08.009. PubMed PMID:  
560 28986106.
- 561 21. Zhang J, Xin L, Shan B, Chen W, Xie M, Yuen D, et al. PEAKS DB: de novo sequencing  
562 assisted database search for sensitive and accurate peptide identification. *Mol Cell Proteomics*.  
563 2012;11(4):M111.010587. Epub 2011/12/22. doi: 10.1074/mcp.M111.010587. PubMed PMID:  
564 22186715; PubMed Central PMCID: PMC3322562.
- 565 22. Jex AR, Liu S, Li B, Young ND, Hall RS, Li Y, et al. *Ascaris suum* draft genome. *Nature*.  
566 2011;479(7374):529-33. Epub 2011/10/28. doi: 10.1038/nature10553. PubMed PMID: 22031327.
- 567 23. Pillai A, Ueno S, Zhang H, Lee JM, Kato Y. Cecropin P1 and novel nematode cecropins:  
568 a bacteria-inducible antimicrobial peptide family in the nematode *Ascaris suum*. *Biochem J*.  
569 2005;390(Pt 1):207-14. Epub 2005/04/27. doi: 10.1042/BJ20050218. PubMed PMID: 15850460;  
570 PubMed Central PMCID: PMC1184576.
- 571 24. Nusbaum MP, Blitz DM, Marder E. Functional consequences of neuropeptide and small-  
572 molecule co-transmission. *Nat Rev Neurosci*. 2017;18(7):389-403. Epub 2017/06/09. doi:  
573 10.1038/nrn.2017.56. PubMed PMID: 28592905; PubMed Central PMCID: PMC5547741.
- 574 25. Ch'ng Q, Sieburth D, Kaplan JM. Profiling synaptic proteins identifies regulators of insulin  
575 secretion and lifespan. *PLoS Genet*. 2008;4(11):e1000283. Epub 2008/12/02. doi:  
576 10.1371/journal.pgen.1000283. PubMed PMID: 19043554; PubMed Central PMCID:  
577 PMC2582949.
- 578 26. Hao Y, Hu Z, Sieburth D, Kaplan JM. RIC-7 promotes neuropeptide secretion. *PLoS*  
579 *Genet*. 2012;8(1):e1002464. Epub 2012/01/26. doi: 10.1371/journal.pgen.1002464. PubMed  
580 PMID: 22275875; PubMed Central PMCID: PMC3261915.
- 581 27. Persson MG, Eklund MB, Dirksen H, Muren JE, Nassel DR. Pigment-dispersing factor in  
582 the locust abdominal ganglia may have roles as circulating neurohormone and central  
583 neuromodulator. *J Neurobiol*. 2001;48(1):19-41. Epub 2001/06/08. PubMed PMID: 11391647.
- 584 28. Choi S, Chatzigeorgiou M, Taylor KP, Schafer WR, Kaplan JM. Analysis of NPR-1  
585 reveals a circuit mechanism for behavioral quiescence in *C. elegans*. *Neuron*. 2013;78(5):869-80.  
586 Epub 2013/06/15. doi: 10.1016/j.neuron.2013.04.002. PubMed PMID: 23764289; PubMed  
587 Central PMCID: PMC3683153.
- 588 29. Janssen T, Husson SJ, Lindemans M, Mertens I, Rademakers S, Ver Donck K, et al.  
589 Functional characterization of three G protein-coupled receptors for pigment dispersing factors in  
590 *Caenorhabditis elegans*. *J Biol Chem*. 2008;283(22):15241-9. Epub 2008/04/09. doi:  
591 10.1074/jbc.M709060200. PubMed PMID: 18390545; PubMed Central PMCID:  
592 PMC3258896.
- 593 30. Janssen T, Husson SJ, Meelkop E, Temmerman L, Lindemans M, Verstraelen K, et al.  
594 Discovery and characterization of a conserved pigment dispersing factor-like neuropeptide  
595 pathway in *Caenorhabditis elegans*. *J Neurochem*. 2009;111(1):228-41. Epub 2009/08/19. doi:  
596 10.1111/j.1471-4159.2009.06323.x. PubMed PMID: 19686386.

- 597 31. Cohen M, Reale V, Olofsson B, Knights A, Evans P, de Bono M. Coordinated regulation  
598 of foraging and metabolism in *C. elegans* by RFamide neuropeptide signaling. *Cell Metab.*  
599 2009;9(4):375-85. Epub 2009/04/10. doi: 10.1016/j.cmet.2009.02.003. PubMed PMID: 19356718.  
600 32. Rhoads ML, Fetterer RH. Purification and characterisation of a secreted aminopeptidase  
601 from adult *Ascaris suum*. *Int J Parasitol.* 1998;28(11):1681-90. Epub 1998/12/10. doi:  
602 10.1016/s0020-7519(98)00091-5. PubMed PMID: 9846604.  
603 33. Wang T, Van Steendam K, Dhaenens M, Vlamincx J, Deforce D, Jex AR, et al. Proteomic  
604 analysis of the excretory-secretory products from larval stages of *Ascaris suum* reveals high  
605 abundance of glycosyl hydrolases. *PLoS Negl Trop Dis.* 2013;7(10):e2467. Epub 2013/10/08. doi:  
606 10.1371/journal.pntd.0002467. PubMed PMID: 24098821; PubMed Central PMCID:  
607 PMCPMC3789772.  
608 34. Chehayeb JF, Robertson AP, Martin RJ, Geary TG. Proteomic analysis of adult *Ascaris*  
609 *suum* fluid compartments and secretory products. *PLoS Negl Trop Dis.* 2014;8(6):e2939. Epub  
610 2014/06/06. doi: 10.1371/journal.pntd.0002939. PubMed PMID: 24901219; PubMed Central  
611 PMCID: PMCPMC4046973.  
612 35. Rosa BA, Townsend R, Jasmer DP, Mitreva M. Functional and phylogenetic  
613 characterization of proteins detected in various nematode intestinal compartments. *Mol Cell*  
614 *Proteomics.* 2015;14(4):812-27. Epub 2015/01/23. doi: 10.1074/mcp.M114.046227. PubMed  
615 PMID: 25609831; PubMed Central PMCID: PMCPMC4390262.  
616 36. Nassel DR. Neuropeptide signaling near and far: how localized and timed is the action of  
617 neuropeptides in brain circuits? *Invert Neurosci.* 2009;9(2):57-75. Epub 2009/09/17. doi:  
618 10.1007/s10158-009-0090-1. PubMed PMID: 19756790.  
619 37. Fellowes RA, Dougan PM, Maule AG, Marks NJ, Halton DW. Neuromusculature of the  
620 ovijector of *Ascaris suum* (Ascaroidea, nematoda): an ultrastructural and immunocytochemical  
621 study. *J Comp Neurol.* 1999;415(4):518-28. Epub 1999/11/26. doi: 10.1002/(sici)1096-  
622 9861(19991227)415:4<518::aid-cne7>3.0.co;2-l. PubMed PMID: 10570459.  
623 38. Moffett CL, Beckett AM, Mousley A, Geary TG, Marks NJ, Halton DW, et al. The ovijector  
624 of *Ascaris suum*: multiple response types revealed by *Caenorhabditis elegans* FMRFamide-  
625 related peptides. *International Journal for Parasitology.* 2003;33(8):859-76. doi: 10.1016/s0020-  
626 7519(03)00109-7.  
627 39. McVeigh P, Geary TG, Marks NJ, Maule AG. The FLP-side of nematodes. *Trends*  
628 *Parasitol.* 2006;22(8):385-96. Epub 2006/07/11. doi: 10.1016/j.pt.2006.06.010. PubMed PMID:  
629 16824799.  
630 40. Atkinson LE, Miskelly IR, Moffett CL, McCoy CJ, Maule AG, Marks NJ, et al. Unraveling  
631 flp-11/flp-32 dichotomy in nematodes. *Int J Parasitol.* 2016;46(11):723-36. Epub 2016/07/28. doi:  
632 10.1016/j.ijpara.2016.05.010. PubMed PMID: 27451358; PubMed Central PMCID:  
633 PMCPMC5038847.  
634 41. Fellowes RA, Maule AG, Marks NJ, Geary TG, Thompson DP, Shaw C, et al. Modulation  
635 of the motility of the vagina vera of *Ascaris suum* in vitro by FMRF amide-related peptides.  
636 *Parasitology.* 1998;116 ( Pt 3):277-87. Epub 1998/04/29. doi: 10.1017/s0031182097002229.  
637 PubMed PMID: 9550221.  
638 42. Fellowes RA, Maule AG, Martin RJ, Geary TG, Thompson DP, Kimber MJ, et al.  
639 Classical neurotransmitters in the ovijector of *Ascaris suum*: localization and modulation of  
640 muscle activity. *Parasitology.* 2000;121 ( Pt 3):325-36. Epub 2000/11/21. doi:  
641 10.1017/s0031182099006290. PubMed PMID: 11085252.  
642 43. Nanda JC, Stretton AO. In situ hybridization of neuropeptide-encoding transcripts *afp-1*,  
643 *afp-3*, and *afp-4* in neurons of the nematode *Ascaris suum*. *J Comp Neurol.* 2010;518(6):896-910.  
644 Epub 2010/01/09. doi: 10.1002/cne.22251. PubMed PMID: 20058230; PubMed Central PMCID:  
645 PMCPMC2972677.  
646 44. Anderson RC, Newton CL, Millar RP, Katz AA. The *Brugia malayi* neuropeptide receptor-  
647 4 is activated by FMRFamide-like peptides and signals via Gai. *Mol Biochem Parasitol.*  
648 2014;195(1):54-8. Epub 2014/07/20. doi: 10.1016/j.molbiopara.2014.07.002. PubMed PMID:  
649 25038481.  
650 45. Nagashima T, Oami E, Kutsuna N, Ishiura S, Suo S. Dopamine regulates body size in  
651 *Caenorhabditis elegans*. *Dev Biol.* 2016;412(1):128-38. Epub 2016/02/28. doi:  
652 10.1016/j.ydbio.2016.02.021. PubMed PMID: 26921458.



- 653 46. Bansal A, Zhu LJ, Yen K, Tissenbaum HA. Uncoupling lifespan and healthspan in  
654 *Caenorhabditis elegans* longevity mutants. *Proc Natl Acad Sci U S A*. 2015;112(3):E277-86.  
655 Epub 2015/01/07. doi: 10.1073/pnas.1412192112. PubMed PMID: 25561524; PubMed Central  
656 PMCID: PMC4311797.
- 657 47. Kage-Nakadai E, Kobuna H, Kimura M, Gengyo-Ando K, Inoue T, Arai H, et al. Two very  
658 long chain fatty acid acyl-CoA synthetase genes, *acs-20* and *acs-22*, have roles in the cuticle  
659 surface barrier in *Caenorhabditis elegans*. *PLoS One*. 2010;5(1):e8857. Epub 2010/01/30. doi:  
660 10.1371/journal.pone.0008857. PubMed PMID: 20111596; PubMed Central PMCID:  
661 PMC42810326.
- 662 48. Li C, Kim K. Family of FLP Peptides in *Caenorhabditis elegans* and Related Nematodes.  
663 *Frontiers in Endocrinology*. 2014;5(150). doi: 10.3389/fendo.2014.00150.
- 664 49. Howe KL, Bolt BJ, Cain S, Chan J, Chen WJ, Davis P, et al. WormBase 2016: expanding  
665 to enable helminth genomic research. *Nucleic Acids Res*. 2016;44(D1):D774-80. Epub  
666 2015/11/19. doi: 10.1093/nar/gkv1217. PubMed PMID: 26578572; PubMed Central PMCID:  
667 PMC4702863.
- 668 50. Bolt BJ, Rodgers FH, Shafie M, Kersey PJ, Berriman M, Howe KL. Using WormBase  
669 ParaSite: An Integrated Platform for Exploring Helminth Genomic Data. *Methods Mol Biol*.  
670 2018;1757:471-91. Epub 2018/05/16. doi: 10.1007/978-1-4939-7737-6\_15. PubMed PMID:  
671 29761467.
- 672 51. Howe KL, Bolt BJ, Shafie M, Kersey P, Berriman M. WormBase ParaSite - a  
673 comprehensive resource for helminth genomics. *Mol Biochem Parasitol*. 2017;215:2-10. Epub  
674 2016/12/03. doi: 10.1016/j.molbiopara.2016.11.005. PubMed PMID: 27899279; PubMed Central  
675 PMCID: PMC486357.
- 676 52. Stiernagle T. Maintenance of *C. elegans*. *WormBook*. 2006:1-11. Epub 2007/12/01. doi:  
677 10.1895/wormbook.1.101.1. PubMed PMID: 18050451; PubMed Central PMCID:  
678 PMC4781397.
- 679 53. Van Sinay E, Mirabeau O, Depuydt G, Van Hiel MB, Peymen K, Watteyne J, et al.  
680 Evolutionarily conserved TRH neuropeptide pathway regulates growth in *Caenorhabditis elegans*.  
681 *Proc Natl Acad Sci U S A*. 2017;114(20):E4065-e74. Epub 2017/05/04. doi:  
682 10.1073/pnas.1617392114. PubMed PMID: 28461507; PubMed Central PMCID:  
683 PMC481806.
- 684 54. Schneider CA, Rasband WS, Eliceiri KW. NIH Image to ImageJ: 25 years of image  
685 analysis. *Nat Methods*. 2012;9(7):671-5. Epub 2012/08/30. doi: 10.1038/nmeth.2089. PubMed  
686 PMID: 22930834; PubMed Central PMCID: PMC3554542.
- 687 55. Chojnacki S, Cowley A, Lee J, Foix A, Lopez R. Programmatic access to bioinformatics  
688 tools from EMBL-EBI update: 2017. *Nucleic Acids Res*. 2017;45(W1):W550-w3. Epub  
689 2017/04/22. doi: 10.1093/nar/gkx273. PubMed PMID: 28431173; PubMed Central PMCID:  
690 PMC5570243.
- 691 56. Mistry J, Finn RD, Eddy SR, Bateman A, Punta M. Challenges in homology search:  
692 HMMER3 and convergent evolution of coiled-coil regions. *Nucleic Acids Res*. 2013;41(12):e121.  
693 Epub 2013/04/20. doi: 10.1093/nar/gkt263. PubMed PMID: 23598997; PubMed Central PMCID:  
694 PMC3695513.
- 695 57. McVeigh P, McCammick E, McCusker P, Wells D, Hodgkinson J, Paterson S, et al.  
696 Profiling G protein-coupled receptors of *Fasciola hepatica* identifies orphan rhodopsins unique to  
697 phylum Platyhelminthes. *Int J Parasitol Drugs Drug Resist*. 2018;8(1):87-103. Epub 2018/02/24.  
698 doi: 10.1016/j.ijpddr.2018.01.001. PubMed PMID: 29474932; PubMed Central PMCID:  
699 PMC6114109.
- 700 58. Holterman M, van der Wurff A, van den Elsen S, van Megen H, Bongers T, Holovachov  
701 O, et al. Phylum-wide analysis of SSU rDNA reveals deep phylogenetic relationships among  
702 nematodes and accelerated evolution toward crown Clades. *Mol Biol Evol*. 2006;23(9):1792-800.  
703 Epub 2006/06/23. doi: 10.1093/molbev/msl044. PubMed PMID: 16790472.
- 704 59. Simao FA, Waterhouse RM, Ioannidis P, Kriventseva EV, Zdobnov EM. BUSCO:  
705 assessing genome assembly and annotation completeness with single-copy orthologs.  
706 *Bioinformatics*. 2015;31(19):3210-2. Epub 2015/06/11. doi: 10.1093/bioinformatics/btv351.  
707 PubMed PMID: 26059717.

708 60. Parra G, Bradnam K, Korf I. CEGMA: a pipeline to accurately annotate core genes in  
709 eukaryotic genomes. *Bioinformatics*. 2007;23(9):1061-7. Epub 2007/03/03. doi:  
710 10.1093/bioinformatics/btm071. PubMed PMID: 17332020.  
711

## 712 **Figure Legends**

713 **Fig 1. *Ascaris suum* pseudocoelomic fluid (As-PCF) contains a rich neuropeptide library.**

714 (A) 41 neuropeptides, including 6 FMRFamide like peptides (FLPs) and 35 neuropeptide like  
715 proteins (NLPs), and 35 antimicrobial peptides (AMPs) are present in As-PCF (n=24 LC-MS/MS  
716 runs representing 67 individual worms; combined data from single worm, pooled female and male  
717 samples). This represents 9.09%, 14.89% and 97.20% of FLP, NLP and AMP peptides  
718 (respectively) predicted from the *in silico* libraries used to query the As-PCF LC-MS/MS data. (B)  
719 Pooled As-PCF (P As-PCF) derived from female nematodes has a richer neuropeptide  
720 complement than single worm As-PCF samples (SW As-PCF) [54 peptides detected in pooled  
721 As-PCF (n=17) vs an average of  $17.75 \pm 1.2$  peptides across single worm samples (n=20)]. (C)  
722 The frequency of detection of individual peptides is variable in As-PCF. Dotted line represents  
723 detection rate in 50% of samples. Nine peptides are detected consistently in >50% of As-PCF  
724 samples [As-Cecropin P1, As-Cecropin P2, As-FLP-18A, As-Cecropin P3, As-Defensin 2, As-  
725 Defensin 1, As-Nemapore 1, As-GRSP-16, As-Cecropin 6]. See Supplementary Data 1 (S1) for  
726 all peptide sequences detected. (D) Mass spectra of (i) FLP-18A detected in As-PCF  
727 (GFGDEMSPGVLR) and (ii) As-FLP-18A isotopic standard (GFGDEMSPGVLRFNH<sub>2</sub>). Amino  
728 acid alignments indicate similar fragmentation patterns for As-FLP-18A detected in As-PCF and  
729 As-FLP-18A isotopic standard but that As-PCF-derived As-FLP-18A is truncated at the C-  
730 terminus. All data are represented as mean  $\pm$  SEM.

731

732 **Fig 2. *Ascaris suum* pseudocoelomic fluid (As-PCF) is bioactive on *Ascaris* ovijector tissue**

733 **and mirrors the synthetic As-FLP-18A peptide response.** (A) Representative muscle tension  
734 recordings showing the effects of As-PCF on *A. suum* ovijector tissue: (i) As-PCF induces two  
735 distinct, concentration dependent, myoactivity profiles (known as response types; RT) on the *A.*  
736 *suum* ovijector; 40  $\mu$ l As-PCF (equivalent to  $\geq 0.15X$  As-PCF where 1X is representative of the

737 biological sample) induces either a transient muscle contraction followed by muscle paralysis (50%  
738 of preparations; RT-2), or immediate muscle relaxation (50% of preparations; RT-1). 4  $\mu$ l As-PCF  
739 (equivalent to 0.015X As-PCF where 1X is representative of the biological sample) induces an RT-  
740 1 response only; (ii) Positive controls [phosphate buffered saline spiked with synthetic As-FLP-18A  
741 (GFGDEMSMPGVLRFNH<sub>2</sub>) before C18 peptide purification; SB] induce two distinct, concentration  
742 dependent, myoactivity profiles on the *A. suum* ovijector. 40  $\mu$ l SB (equivalent to final concentration  
743 of 1  $\mu$ M synthetic As-FLP-18A) induces either a RT-2 (50% of preparations), or RT-1 (50% of  
744 preparations) response. 4  $\mu$ l SB (equivalent to final concentration of 0.1  $\mu$ M synthetic As-FLP-18A)  
745 induces an inhibitory RT-1 response only; (iii) Positive controls [phosphate buffered saline spiked  
746 with synthetic As-FLP-18A (GFGDEMSMPGVLRFNH<sub>2</sub>) after C18 peptide purification (SA) also  
747 induce a concentration dependent myoactivity profile on the *A. suum* ovijector. 40  $\mu$ l and 4  $\mu$ l SA  
748 controls (equivalent to final concentration of 1  $\mu$ M and 100 nM synthetic As-FLP-18A, respectively)  
749 induce an RT-2 response in 100% of preparations. 40  $\mu$ l and 4  $\mu$ l SA controls (equivalent to final  
750 concentration of 1  $\mu$ M and 100 nM synthetic As-FLP-18A, respectively) induce an RT-2 response  
751 in 100% of preparations; (iv) Negative control (perfused activation solution only resuspended in  
752 ddH<sub>2</sub>O) does not modulate intrinsic ovijector contractility. Test compounds (As-PCF, SB, SA,  
753 negative control), were present during the period indicated by arrows. Vertical scales represent 2  
754 mg and horizontal scales represent 2 min. (B) The effects of As-PCF and positive controls (SB and  
755 SA) on: (i) contraction frequency, (ii) contraction amplitude and, (iii) muscle tension of the *A. suum*  
756 ovijector. Test compounds (As-PCF, SB or SA) were added at 0 min and washed out at 10 min.  
757 Data are presented as mean  $\pm$  SEM [see Supplementary Table 1 (S1 Table)]. (C) Representative  
758 muscle tension recordings showing the effects of synthetic As-FLP-18A on *A. suum* ovijector tissue.  
759 1 nM-10  $\mu$ M synthetic As-FLP-18A induce concentration dependent myoexcitatory effects; 10  $\mu$ M  
760 synthetic As-FLP-18A induces two distinct myoexcitatory profiles consisting with RT-2 (35.7% of  
761 preparations), or RT-1 (64.2% of preparations); 1  $\mu$ M-10 nM synthetic As-FLP-18A induce RT-2  
762 responses only. The truncated form of synthetic As-FLP-18A (GFGDEMSMPGVLR; 10  $\mu$ M) does  
763 not modulate ovijector contractility. Negative control (ddH<sub>2</sub>O) does not modulate intrinsic ovijector  
764 contractility. Peptide was present during the period indicated by the arrows. Vertical scales



765 represent 2 mg and horizontal scales represent 2 min. (D) The concentration dependent effects of  
766 1 nM-10  $\mu$ M synthetic As-FLP-18A on (i) contraction frequency, (ii) contraction amplitude and, (iii)  
767 muscle tension of the *A. suum* ovijector. Peptide was added at 0 min and washed out at 10 min.  
768 All data are presented as mean  $\pm$  SEM [see Supplementary Table 2 (S2 Table)].

769

770 **Fig 3. *Ascaris* PCF activates heterologously expressed *Caenorhabditis elegans***  
771 **neuropeptide receptors NPR-4 and NPR-5 in mammalian cell lines.** (A) *C. elegans* NPR-4 (Ce-  
772 NPR-4) and -5 (Ce-NPR-5) expressed in CHO cells are activated by synthetic As-FLP-18 peptides  
773 (10  $\mu$ M; As-FLP-18A: GFGDEMSPGVLRFNH<sub>2</sub>; As-FLP-18B: GMPGVLRFNH<sub>2</sub>; As-FLP-18C:  
774 AVPGVLRFNH<sub>2</sub>; As-FLP-18D: GDVPGVLRFNH<sub>2</sub>; As-FLP-18E: SDMPGVLRFNH<sub>2</sub>; As-FLP-18F:  
775 SMPGVLRFNH<sub>2</sub>) compared to controls transfected with an empty vector (pcDNA3.1). (B) Ce-NPR-  
776 4 is activated by As-PCF in a concentration dependent manner compared to both peptide-free cell  
777 medium (BSA) and empty vector (pcDNA3.1) negative controls. The cognate Ce-NPR-4 peptide  
778 Ce-FLP-18A (DFDGAMPGVLRFNH<sub>2</sub>) and As-FLP-18A were used as positive controls. (C) Ce-  
779 NPR-5 is also activated by As-PCF in a concentration dependent manner compared to both  
780 peptide-free cell medium (BSA) and empty vector (pcDNA3.1) negative controls. The cognate Ce-  
781 NPR-5 peptide Ce-FLP-18A and As-FLP-18A were used as positive controls. In all cases data are  
782 shown as the ratio of peptide/As-PCF response to total calcium response. Error bars represent  
783 mean  $\pm$  SEM., n>3 replicates. Statistical significance of peptide or As-PCF-evoked responses  
784 compared with BSA or empty vector controls was determined by two-way ANOVA and Tukey's  
785 multiple comparisons test. *P*-values are denoted by: \*\*\*<0.001 and \*\*\*\*<0.0001.

786

787 **Fig 4. Exogenous application of *Ascaris suum* PCF (As-PCF) and synthetic As-FLP-18A**  
788 **influences *Caenorhabditis elegans* growth, reproduction and motility.** (A) *C. elegans* growth  
789 (as measured by changes in body length) is significantly reduced in nematodes exposed to 2% and  
790 5% As-PCF and 100  $\mu$ M synthetic As-FLP-18A (GFGDEMSPGVLRFNH<sub>2</sub>) compared to the  
791 negative control (nematodes exposed to S-medium only). (B) *C. elegans* reproduction (as  
792 measured by progeny) is significantly reduced in nematodes exposed to 1%, 2%, 5% As-PCF and

793 100  $\mu$ M synthetic As-FLP-18A relative to the negative control (nematodes treated with S-medium  
794 only). (C) *C. elegans* motility (as measured locomotory activity over time) is significantly reduced  
795 in nematodes exposed to 5%, 7.5%, 10% As-PCF and 10  $\mu$ M synthetic As-FLP-18A compared to  
796 the negative control (nematodes exposed to M9 only). Statistical significance determined by one-  
797 way ANOVA and Dunnett's multiple comparisons test (A and B) or two-way ANOVA and Tukey's  
798 multiple comparisons test (C). *P*-values are denoted by: \* <0.05, \*\*<0.01, \*\*\*<0.001 and  
799 \*\*\*\*<0.0001.

800

801 **Fig 5. *Caenorhabditis elegans flp-18*, and the cognate FLP-GPCR encoding gene**  
802 **homologues *npr-4* and *npr-5* display pan-phylum conservation in nematodes.** Pan-phylum  
803 HMM analysis of 134 nematode genomes (109 species) demonstrates that *C. elegans flp-18*, *npr-*  
804 *4* and *npr-5* encoding gene homologues are highly conserved (99%, 93%, 84% respectively) in  
805 nematodes. Black boxes indicate the presence of a putative gene homologue. Presence/absence  
806 identified based on motif conservation and reciprocal BLAST. Nematode species are arranged  
807 based on 12 clade designation [58]. Asterisk denotes that multiple genomes were mined per  
808 species. Genome quality is indicated by CEGMA and BUSCO scores obtained from Wormbase  
809 Parasite version 14 [49-51, 59, 60]. A list of genomes mined, HMM query sequences returned and  
810 retrieved gene homologues are detailed in Supplementary Data 2 (S2).

811

812 **Table 1. High confidence peptides (>1% FDR) detected by LC-MS/MS in *Ascaris suum* PCF.**

| Peptide Name                | Peptide Sequence Predicted                                                | Peptide Sequence Detected                                                                                                                   | % Peptide Coverage Detected | Confidence (-10lgP)                      | % Samples Peptide Detected | Sex   |
|-----------------------------|---------------------------------------------------------------------------|---------------------------------------------------------------------------------------------------------------------------------------------|-----------------------------|------------------------------------------|----------------------------|-------|
| As-FLP-18A                  | GFGDEMSPGVLR <sup>F</sup>                                                 | (A) GFGDEMSPGVLR <sup>F</sup><br>(B) (GFGDEM(+15.99)SMPGVLR) <sup>F</sup>                                                                   | 93                          | 88.71 <sup>F</sup>                       | 92                         | FM, M |
| As-NLP-20D1                 | EMQFAFEEPSVDAERFARFA                                                      | (A) AFEEPSVDAER <sup>F</sup><br>(B) FEEPSVDAER <sup>F</sup>                                                                                 | 55                          | 92.71 <sup>F</sup><br>60.76 <sup>M</sup> | 21                         | FM, M |
| As-NLP-40C                  | SVVSTKEQVLQAIIE                                                           | SVVSTKEQVLQ                                                                                                                                 | 79                          | 45.32                                    | 21                         | FM    |
| As-NLP-42C                  | ALGGSVSPQWESSGWTWGEQTFPLQESHTRALRVAMT                                     | E(-18.01)QTFP(-.98)                                                                                                                         | 13                          | 71.58                                    | 46                         | FM    |
| As-Cecropin-1 (P1)          | SWLSKTAKKLENSAKKRISIEGIAIAIQGGPR                                          | SWLSKTAKKLENSAKKRISIEGIAIAIQGGPR <sup>F</sup>                                                                                               | 100                         | 309.6 <sup>F</sup><br>182.2 <sup>M</sup> | 100                        | FM, M |
| As-Cecropin-2 (P2)          | SWLSKTYKKLENSAKKRISIEGIAIAIQGGPR                                          | SWLSKTYKKLENSAKKRISIEGIAIAIQGGPR <sup>F</sup>                                                                                               | 100                         | 290.1 <sup>F</sup><br>154.2 <sup>M</sup> | 96                         | FM, M |
| As-Cecropin-3 (P3)          | SWLSKTAKKLENSAKKRISIEGIAIAIKGGSR                                          | SWLSKTAKKLENSAKKRISIEGIAIAIKGGSR <sup>F</sup>                                                                                               | 97                          | 210.5 <sup>F</sup><br>125.0 <sup>M</sup> | 87.5                       | FM, M |
| As-Defensin-1 (ASABF-6Cysa) | NPQSTMDNSEHDHNVKRDLCNGRCKRMKCVLGASCKQRSQWVVCVKRPKDV<br>MIKN               | (A) P.Q(-17.03)STMDNSEHDHNVK <sup>F</sup><br>(B) (P.Q(-17.03)STM(+15.99)DNSEHDHNVK) <sup>F</sup><br>(C) Q(-17.03)STMDNSEHDHNVK <sup>F</sup> | 24                          | 191.6 <sup>F</sup><br>134.8 <sup>M</sup> | 79                         | FM, M |
| As-Defensin-2 (ASABF-a)     | AVDFSSCARMDVPGLSKVAQGLCISSCKFQNGTGHCEKRGGRPTCVCDRCG<br>RGGGEWPSVPMKGRSSRG | (A) GGGEWPSVPMKGRSSRG<br>(B) (Q(-17.03)GLCISS(-.98)(+79.96))                                                                                | 35                          | 271.4                                    | 88                         | FM    |
| As-Defensin-14              | GCPQHVCNKHCLKLHGSRGYCGGEDRSCTCGMLFDY                                      | LHGSRGY                                                                                                                                     | 18                          | 67.96                                    | 17                         | FM    |

813

814 <sup>F</sup>Denotes data derived from female As-PCF samples; <sup>M</sup>Denotes data derived from male As-PCF  
815 samples.

816

## 817 Supplementary information

818 **S1 File. As-PCF peptides detected in this study.** High confidence peptides (>1% FDR) detected  
819 across all samples (Table 1; Tab 1); All peptides detected in single female samples (Table 2; Tab  
820 2); All peptides detected in pooled female samples (Table 3; Tab 3); All peptides detected in pooled  
821 male samples (Table 4; Tab 4). In all cases -10lgP denotes P-value [-10\*log<sub>10</sub>(P-value)] as  
822 converted by PEAKS software.

823

824 **S2 File. Nematode genomes mined for gene sequelogues of *flp-18*, *npr-4* and *npr-5*.**  
825 Wormbase ParaSite [<https://parasite.wormbase.org/index.html>; 49, 50, 51] gene IDs are provided  
826 for each identified sequelogue. Gene IDs highlighted in red indicate sequences that were used to  
827 build Hidden Markov Models. Genomic locations for representative partial sequences from  
828 TBLASTN hits are detailed where appropriate.

829

830 **S1 Table. The modulatory effects of As-PCF on *Ascaris suum* ovijector tissue preparations.**

831

832 **S2 Table. The modulatory effects of synthetic As-FLP-18A on *Ascaris suum* ovijector**

833 **tissue preparations.**

834

**A**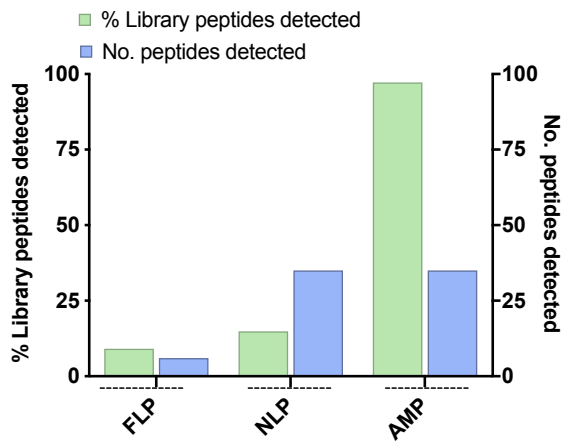**B**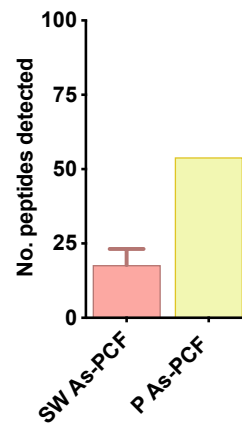**C**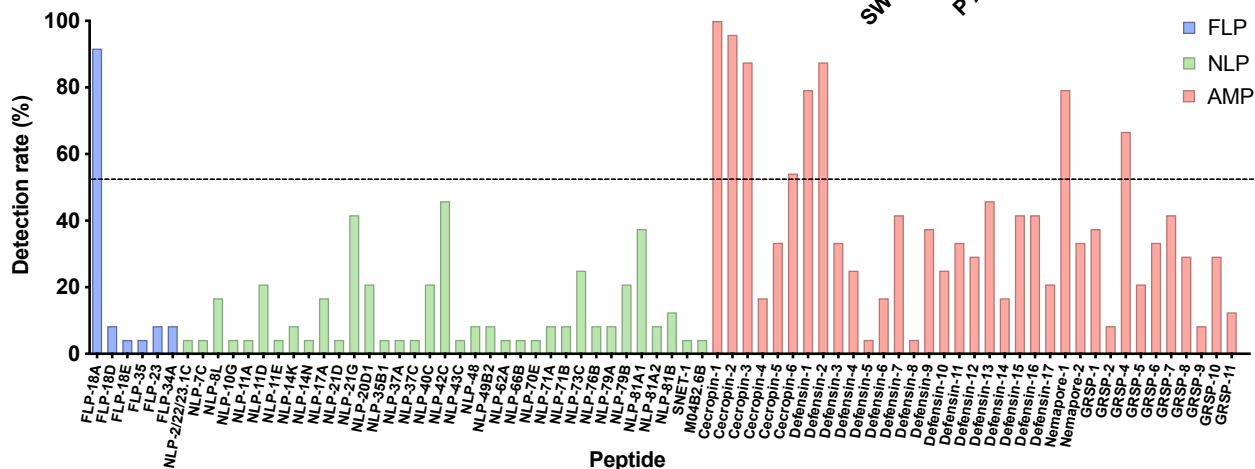**D**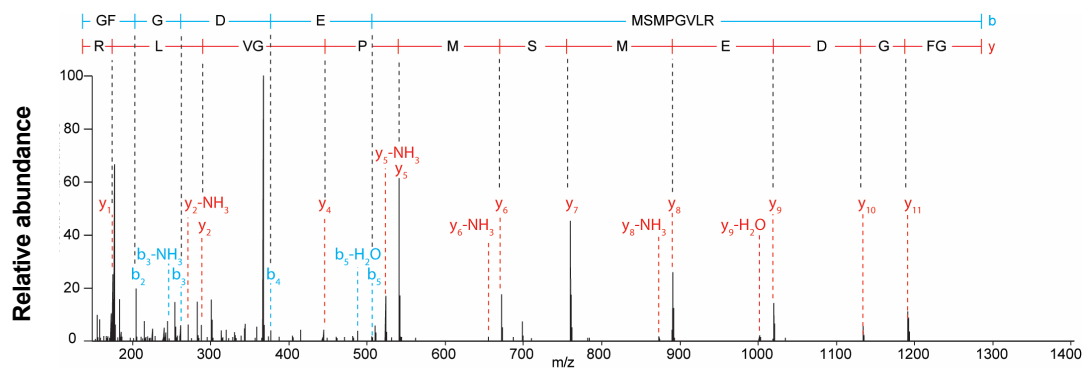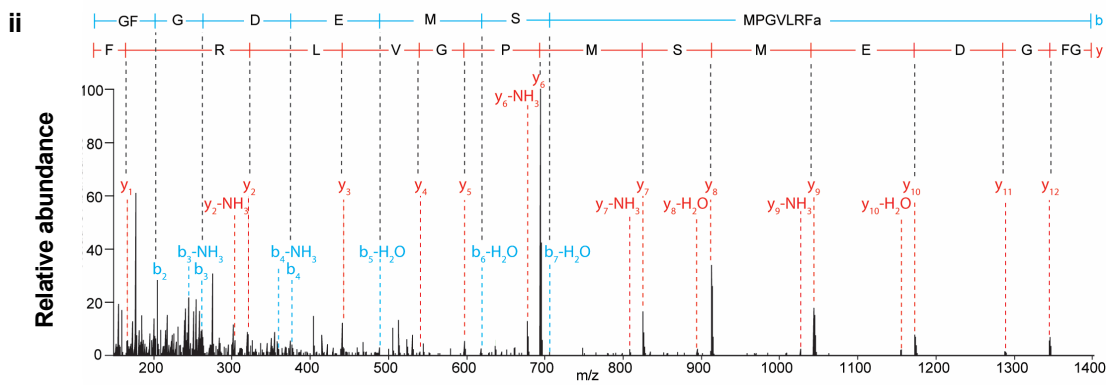



█ NPR-5  
█ NPR-4  
█ pcDNA3.1

**A**

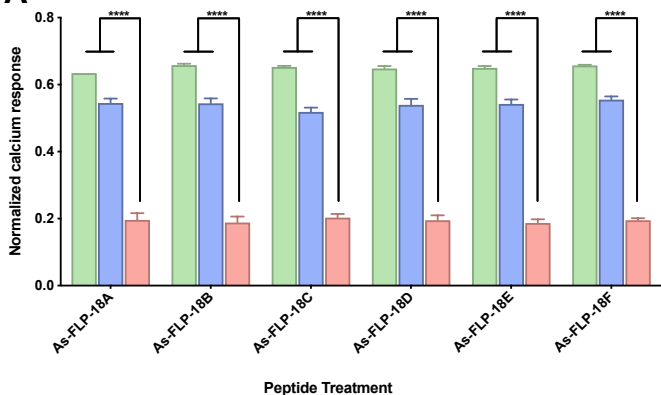

**B**

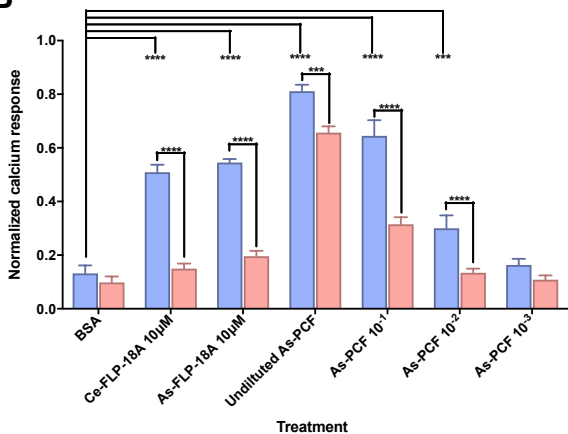

**C**

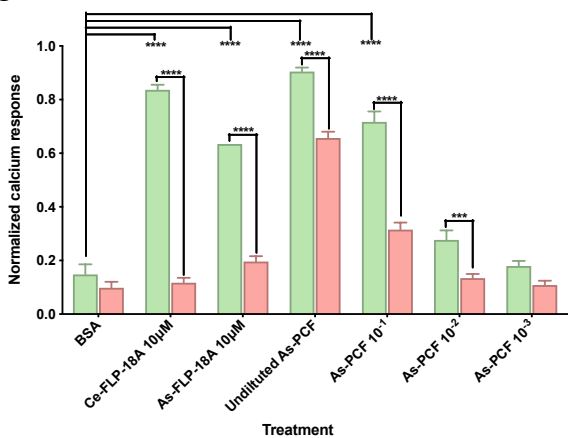

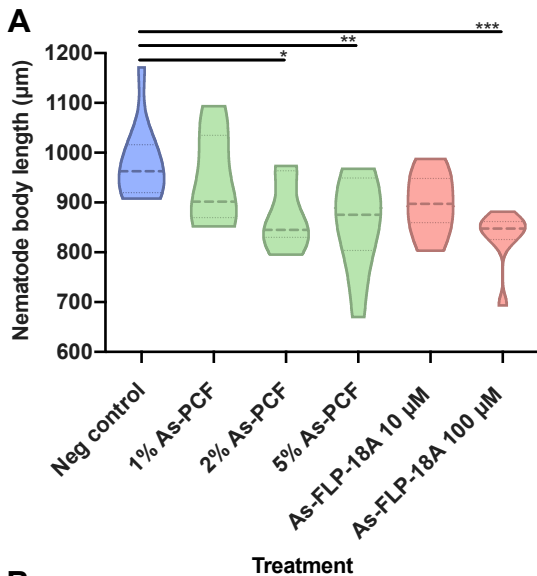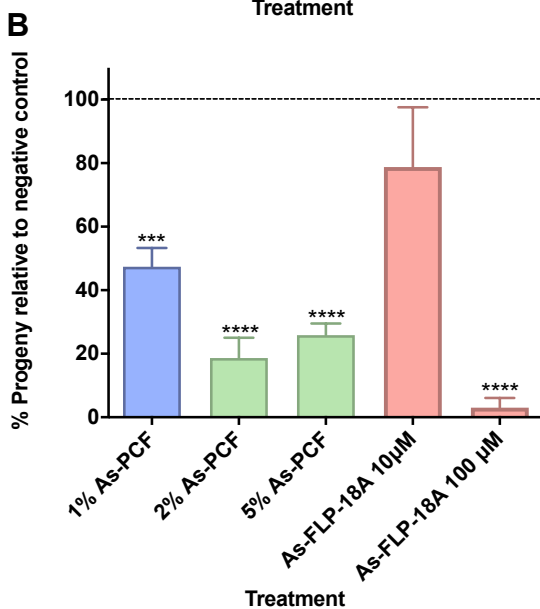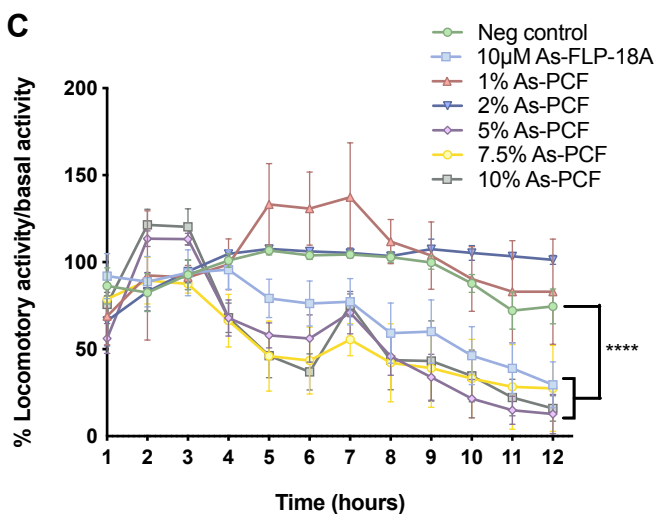



| Clade                                | Species                              | CEGMA %  |    |          | BUSCO %  |    |     | flp -18 | npr -4 | npr -5 |
|--------------------------------------|--------------------------------------|----------|----|----------|----------|----|-----|---------|--------|--------|
|                                      |                                      | 0        | 50 | 100      | 0        | 50 | 100 |         |        |        |
| 2                                    | <i>Romanomermis culicivorax</i>      | ●●●●●●   |    |          | ●●●      |    |     |         |        |        |
|                                      | <i>Soboliphyme baturini</i>          | ●●●●●●   |    |          | ●●●●     |    |     |         |        |        |
|                                      | <i>Trichinella britovi</i>           | ●●●●●●●● |    |          | ●●●●●●●● |    |     |         |        |        |
|                                      | <i>Trichinella murrelli</i>          | ●●●●●●●● |    |          | ●●●●●●●● |    |     |         |        |        |
|                                      | <i>Trichinella nativa*</i>           | ●●●●●●●● |    |          | ●●●●●●●● |    |     |         |        |        |
|                                      | <i>Trichinella nelsoni</i>           | ●●●●●●●● |    |          | ●●●●●●●● |    |     |         |        |        |
|                                      | <i>Trichinella papuae</i>            | ●●●●●●●● |    |          | ●●●●●●●● |    |     |         |        |        |
|                                      | <i>Trichinella patagoniensis</i>     | ●●●●●●●● |    |          | ●●●●●●●● |    |     |         |        |        |
|                                      | <i>Trichinella pseudospiralis*</i>   | ●●●●●●●● |    |          | ●●●●●●●● |    |     |         |        |        |
|                                      | <i>Trichinella spiralis*</i>         | ●●●●●●●● |    |          | ●●●●●●●● |    |     |         |        |        |
|                                      | <i>Trichinella sp. T6</i>            | ●●●●●●●● |    |          | ●●●●●●●● |    |     |         |        |        |
|                                      | <i>Trichinella sp. T8</i>            | ●●●●●●●● |    |          | ●●●●●●●● |    |     |         |        |        |
|                                      | <i>Trichinella sp. T9</i>            | ●●●●●●●● |    |          | ●●●●●●●● |    |     |         |        |        |
|                                      | <i>Trichinella zimbabwensis</i>      | ●●●●●●●● |    |          | ●●●●●●●● |    |     |         |        |        |
|                                      | <i>Trichuris muris</i>               | ●●●●●●●● |    |          | ●●●●●●●● |    |     |         |        |        |
|                                      | <i>Trichuris suis*</i>               | ●●●●●●●● |    |          | ●●●●●●●● |    |     |         |        |        |
| <i>Trichuris trichiura</i>           | ●●●●●●●●                             |          |    | ●●●●●●●● |          |    |     |         |        |        |
| 6                                    | <i>Plectesambesii</i>                | ●●●●●●   |    |          | ●●●●●●   |    |     |         |        |        |
| 8                                    | <i>Acanthocheilonema viteae</i>      | ●●●●●●   |    |          | ●●●●●●   |    |     |         |        |        |
|                                      | <i>Anisakis simplex</i>              | ●●●●●●   |    |          | ●●●●●●   |    |     |         |        |        |
|                                      | <i>Ascaris lumbricoides</i>          | ●●●●●●   |    |          | ●●●●●●   |    |     |         |        |        |
|                                      | <i>Ascaris suum*</i>                 | ●●●●●●   |    |          | ●●●●●●   |    |     |         |        |        |
|                                      | <i>Brugia malayi</i>                 | ●●●●●●   |    |          | ●●●●●●   |    |     |         |        |        |
|                                      | <i>Brugia pahangi</i>                | ●●●●●●   |    |          | ●●●●●●   |    |     |         |        |        |
|                                      | <i>Brugia timori</i>                 | ●●●●●●   |    |          | ●●●●●●   |    |     |         |        |        |
|                                      | <i>Diraofilaria immitis</i>          | ●●●●●●   |    |          | ●●●●●●   |    |     |         |        |        |
|                                      | <i>Dracunculus medinensis</i>        | ●●●●●●   |    |          | ●●●●●●   |    |     |         |        |        |
|                                      | <i>Elaeophora elaphi</i>             | ●●●●●●   |    |          | ●●●●●●   |    |     |         |        |        |
|                                      | <i>Enterobius vermicularis</i>       | ●●●●●●   |    |          | ●●●●●●   |    |     |         |        |        |
|                                      | <i>Gongylonema pulchrum</i>          | ●●●●●●   |    |          | ●●●●●●   |    |     |         |        |        |
|                                      | <i>Litomosoides sigmodontis</i>      | ●●●●●●   |    |          | ●●●●●●   |    |     |         |        |        |
|                                      | <i>Loa loa*</i>                      | ●●●●●●   |    |          | ●●●●●●   |    |     |         |        |        |
|                                      | <i>Onchocerca flexuosa*</i>          | ●●●●●●   |    |          | ●●●●●●   |    |     |         |        |        |
|                                      | <i>Onchocerca ochengi*</i>           | ●●●●●●   |    |          | ●●●●●●   |    |     |         |        |        |
|                                      | <i>Onchocerca volvulus</i>           | ●●●●●●   |    |          | ●●●●●●   |    |     |         |        |        |
|                                      | <i>Parascaris equorum</i>            | ●        |    |          | ●        |    |     |         |        |        |
| <i>Parascaris univalens</i>          | ●●●●●●                               |          |    | ●●●●●●   |          |    |     |         |        |        |
| <i>Syphacia muris</i>                | ●●●●●●                               |          |    | ●●●●●●   |          |    |     |         |        |        |
| <i>Thelazia callipaeda</i>           | ●●●●●●                               |          |    | ●●●●●●   |          |    |     |         |        |        |
| <i>Toxocara canis*</i>               | ●●●●●●                               |          |    | ●●●●●●   |          |    |     |         |        |        |
| <i>Wuchereria bancrofti*</i>         | ●●●●●●                               |          |    | ●●●●●●   |          |    |     |         |        |        |
| 9                                    | <i>Ancylostoma caninum</i>           | ●●●●●●   |    |          | ●●●●●●   |    |     |         |        |        |
|                                      | <i>Ancylostoma ceylanicum*</i>       | ●●●●●●   |    |          | ●●●●●●   |    |     |         |        |        |
|                                      | <i>Ancylostoma duodenale</i>         | ●●●●●●   |    |          | ●●●●●●   |    |     |         |        |        |
|                                      | <i>Angiostrongylus cantonensis</i>   | ●●●●●●   |    |          | ●●●●●●   |    |     |         |        |        |
|                                      | <i>Angiostrongylus costaricensis</i> | ●●●●●●   |    |          | ●●●●●●   |    |     |         |        |        |
|                                      | <i>Caenorhabditis angaria</i>        | ●●●●●●   |    |          | ●●●●●●   |    |     |         |        |        |
|                                      | <i>Caenorhabditis brenneri</i>       | ●●●●●●   |    |          | ●●●●●●   |    |     |         |        |        |
|                                      | <i>Caenorhabditis briggsae</i>       | ●●●●●●   |    |          | ●●●●●●   |    |     |         |        |        |
|                                      | <i>Caenorhabditis elegans</i>        | ●●●●●●   |    |          | ●●●●●●   |    |     |         |        |        |
|                                      | <i>Caenorhabditis inopinata</i>      | ●●●●●●   |    |          | ●●●●●●   |    |     |         |        |        |
|                                      | <i>Caenorhabditis japonica</i>       | ●●●●●●   |    |          | ●●●●●●   |    |     |         |        |        |
|                                      | <i>Caenorhabditis latens</i>         | ●●●●●●   |    |          | ●●●●●●   |    |     |         |        |        |
|                                      | <i>Caenorhabditis nigoni</i>         | ●●●●●●   |    |          | ●●●●●●   |    |     |         |        |        |
|                                      | <i>Caenorhabditis remanei*</i>       | ●●●●●●   |    |          | ●●●●●●   |    |     |         |        |        |
|                                      | <i>Caenorhabditis sinica</i>         | ●●●●●●   |    |          | ●●●●●●   |    |     |         |        |        |
|                                      | <i>Caenorhabditis tropicalis</i>     | ●●●●●●   |    |          | ●●●●●●   |    |     |         |        |        |
|                                      | <i>Cylicostephanus goldi</i>         | ●●       |    |          | ●        |    |     |         |        |        |
|                                      | <i>Dictyocaulus viviparus*</i>       | ●●●●●●   |    |          | ●●●●●●   |    |     |         |        |        |
|                                      | <i>Diploscapter coronatus</i>        | ●●●●●●   |    |          | ●●●●●●   |    |     |         |        |        |
|                                      | <i>Diploscapter pachys</i>           | ●●●●●●   |    |          | ●●●●●●   |    |     |         |        |        |
|                                      | <i>Haemonchus contortus*</i>         | ●●●●●●   |    |          | ●●●●●●   |    |     |         |        |        |
|                                      | <i>Haemonchus placei</i>             | ●●●●●●   |    |          | ●●●●●●   |    |     |         |        |        |
|                                      | <i>Heligmosomoides polygyrus*</i>    | ●●●●●●   |    |          | ●●●●●●   |    |     |         |        |        |
|                                      | <i>Heterorhabditis bacteriophora</i> | ●●●●●●   |    |          | ●●●●●●   |    |     |         |        |        |
|                                      | <i>Mesorhabditis belari</i>          | ●●●●●●   |    |          | ●●●●●●   |    |     |         |        |        |
|                                      | <i>Micoletzkyia japonica</i>         | ●●●●●●   |    |          | ●●●●●●   |    |     |         |        |        |
| <i>Necator americanus</i>            | ●●●●●●                               |          |    | ●●●●●●   |          |    |     |         |        |        |
| <i>Nippostrongylus brasiliensis</i>  | ●●●●●●                               |          |    | ●●●●●●   |          |    |     |         |        |        |
| <i>Oesophagostomum dentatum</i>      | ●●●●●●                               |          |    | ●●●●●●   |          |    |     |         |        |        |
| <i>Oscheius tipulae</i>              | ●●●●●●                               |          |    | ●●●●●●   |          |    |     |         |        |        |
| <i>Parapristionchus giblindavisi</i> | ●●●●●●                               |          |    | ●●●●●●   |          |    |     |         |        |        |
| <i>Pristionchus arcanus</i>          | ●●●●●●                               |          |    | ●●●●●●   |          |    |     |         |        |        |
| <i>Pristionchus entomophagus</i>     | ●●●●●●                               |          |    | ●●●●●●   |          |    |     |         |        |        |
| <i>Pristionchus expectatus</i>       | ●●●●●●                               |          |    | ●●●●●●   |          |    |     |         |        |        |
| <i>Pristionchus fissidentatus</i>    | ●●●●●●                               |          |    | ●●●●●●   |          |    |     |         |        |        |
| <i>Pristionchus japonicus</i>        | ●●●●●●                               |          |    | ●●●●●●   |          |    |     |         |        |        |
| <i>Pristionchus maxplancki</i>       | ●●●●●●                               |          |    | ●●●●●●   |          |    |     |         |        |        |
| <i>Pristionchus mayeri</i>           | ●●●●●●                               |          |    | ●●●●●●   |          |    |     |         |        |        |
| <i>Pristionchus pacificus</i>        | ●●●●●●                               |          |    | ●●●●●●   |          |    |     |         |        |        |
| <i>Strongylus vulgaris</i>           | ●●●●                                 |          |    | ●●       |          |    |     |         |        |        |
| <i>Teladorsagia circumcincta</i>     | ●●●●●●                               |          |    | ●●●●●●   |          |    |     |         |        |        |
| 10                                   | <i>Bursaphelenchus xylophilus</i>    | ●●●●●●   |    |          | ●●●●●●   |    |     |         |        |        |
|                                      | <i>Halicephalobus mephisto</i>       | ●●●●●●   |    |          | ●●●●●●   |    |     |         |        |        |
|                                      | <i>Panaqrellus redivivus</i>         | ●●●●●●   |    |          | ●●●●●●   |    |     |         |        |        |
|                                      | <i>Parastrongyloides trichosuri</i>  | ●●●●●●   |    |          | ●●●●●●   |    |     |         |        |        |
|                                      | <i>Rhabditophanes sp. KR3021</i>     | ●●●●●●   |    |          | ●●●●●●   |    |     |         |        |        |
|                                      | <i>Steinernema carpocapsae</i>       | ●●●●●●   |    |          | ●●●●●●   |    |     |         |        |        |
|                                      | <i>Steinernema feltiae</i>           | ●●●●●●   |    |          | ●●●●●●   |    |     |         |        |        |
|                                      | <i>Steinernema glaseri</i>           | ●●●●●●   |    |          | ●●●●●●   |    |     |         |        |        |
|                                      | <i>Steinernema monticolum</i>        | ●●●●●●   |    |          | ●●●●●●   |    |     |         |        |        |
|                                      | <i>Steinernema scapterisci</i>       | ●●●●●●   |    |          | ●●●●●●   |    |     |         |        |        |
|                                      | <i>Strongyloides papillosus</i>      | ●●●●●●   |    |          | ●●●●●●   |    |     |         |        |        |
|                                      | <i>Strongyloides ratti</i>           | ●●●●●●   |    |          | ●●●●●●   |    |     |         |        |        |
|                                      | <i>Strongyloides stercoralis</i>     | ●●●●●●   |    |          | ●●●●●●   |    |     |         |        |        |
| <i>Strongyloides venezuelensis</i>   | ●●●●●●                               |          |    | ●●●●●●   |          |    |     |         |        |        |
| 11                                   | <i>Acrobeloides nanus</i>            | ●●●●●●   |    |          | ●●●●●●   |    |     |         |        |        |
| 12                                   | <i>Ditylenchus destructor</i>        | ●●●●●●   |    |          | ●●●●●●   |    |     |         |        |        |
|                                      | <i>Ditylenchus dipsaci</i>           | ●●●●●●   |    |          | ●●●●●●   |    |     |         |        |        |
|                                      | <i>Globodera pallida</i>             | ●●●●●●   |    |          | ●●●●     |    |     |         |        |        |
|                                      | <i>Globodera rostochiensis</i>       | ●●●●●●   |    |          | ●●●●●●   |    |     |         |        |        |
|                                      | <i>Heterodera glycines</i>           | ●●●●●●   |    |          | ●●●●●●   |    |     |         |        |        |
|                                      | <i>Meloidogyne arenaria*</i>         | ●●●●●●   |    |          | ●●●●●●   |    |     |         |        |        |
|                                      | <i>Meloidogyne enterolobii</i>       | ●●●●●●   |    |          | ●●●●●●   |    |     |         |        |        |
|                                      | <i>Meloidogyne floridensis*</i>      | ●●●●●●   |    |          | ●●●●     |    |     |         |        |        |
|                                      | <i>Meloidogyne graminicola</i>       | ●●●●●●   |    |          | ●●●●     |    |     |         |        |        |
|                                      | <i>Meloidogyne hapla</i>             | ●●●●●●   |    |          | ●●●●●●   |    |     |         |        |        |
|                                      | <i>Meloidogyne incognita*</i>        | ●●●●●●   |    |          | ●●●●●●   |    |     |         |        |        |
|                                      | <i>Meloidogyne javanica*</i>         | ●●●●●●   |    |          | ●●●●●●   |    |     |         |        |        |
